# Supplementary material for: Poor statistical reporting, inadequate data presentation and spin persist despite editorial advice
Source: PubMed Central journal article supplement (PMC6093658; doi:10.1371/journal.pone.0202121), 2018-08-15

# Question 1: Are all written measures that summarize data variability defined?

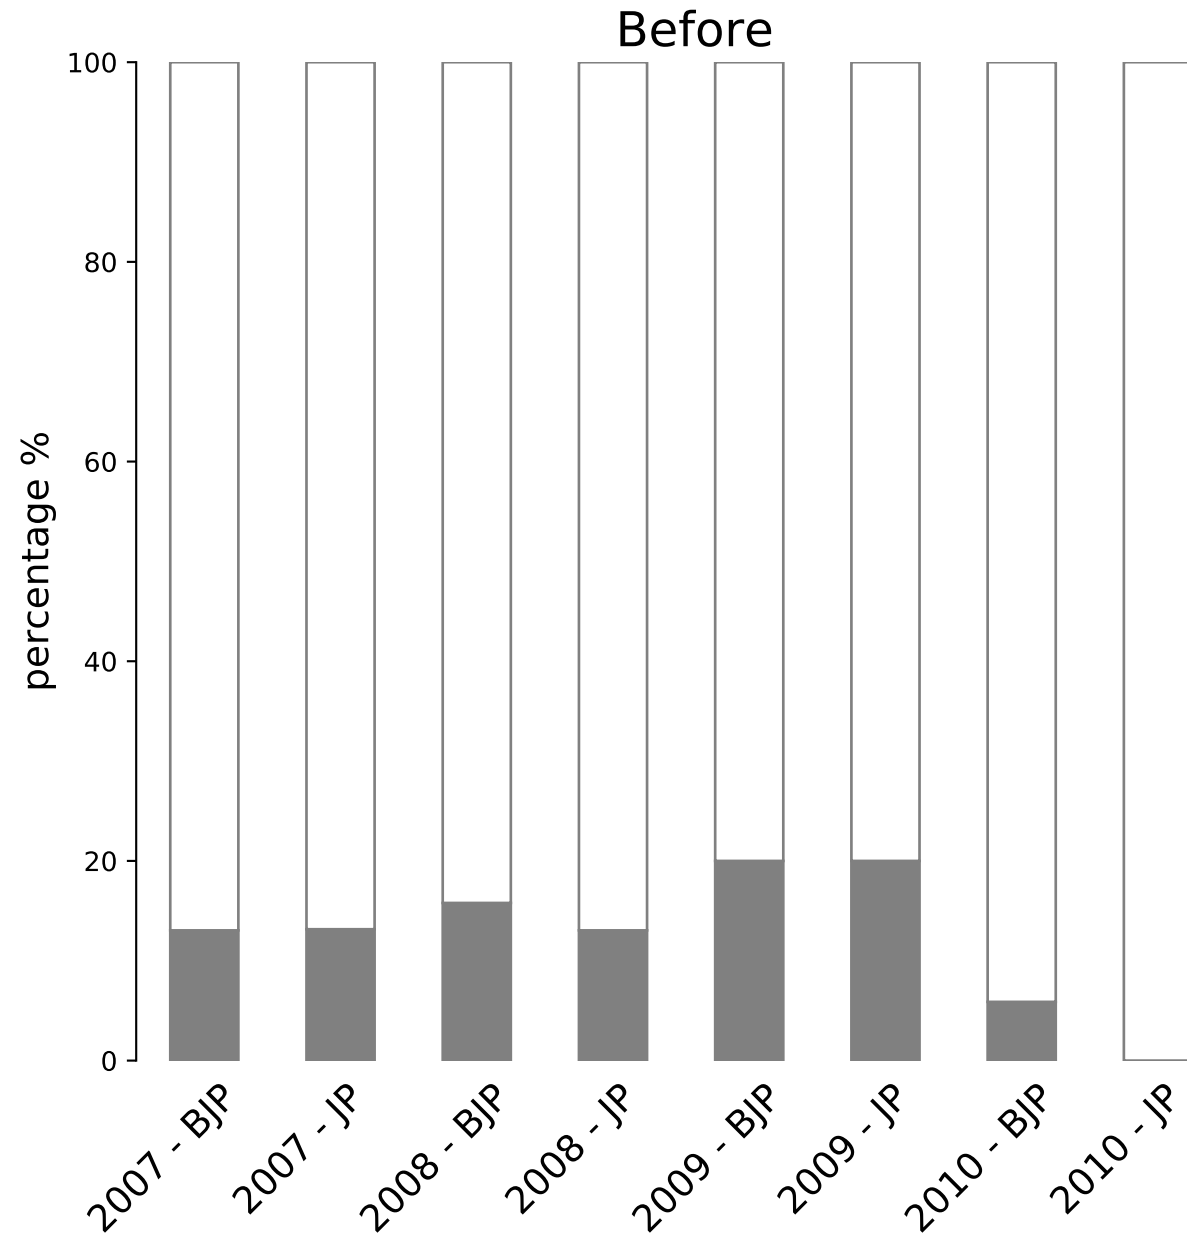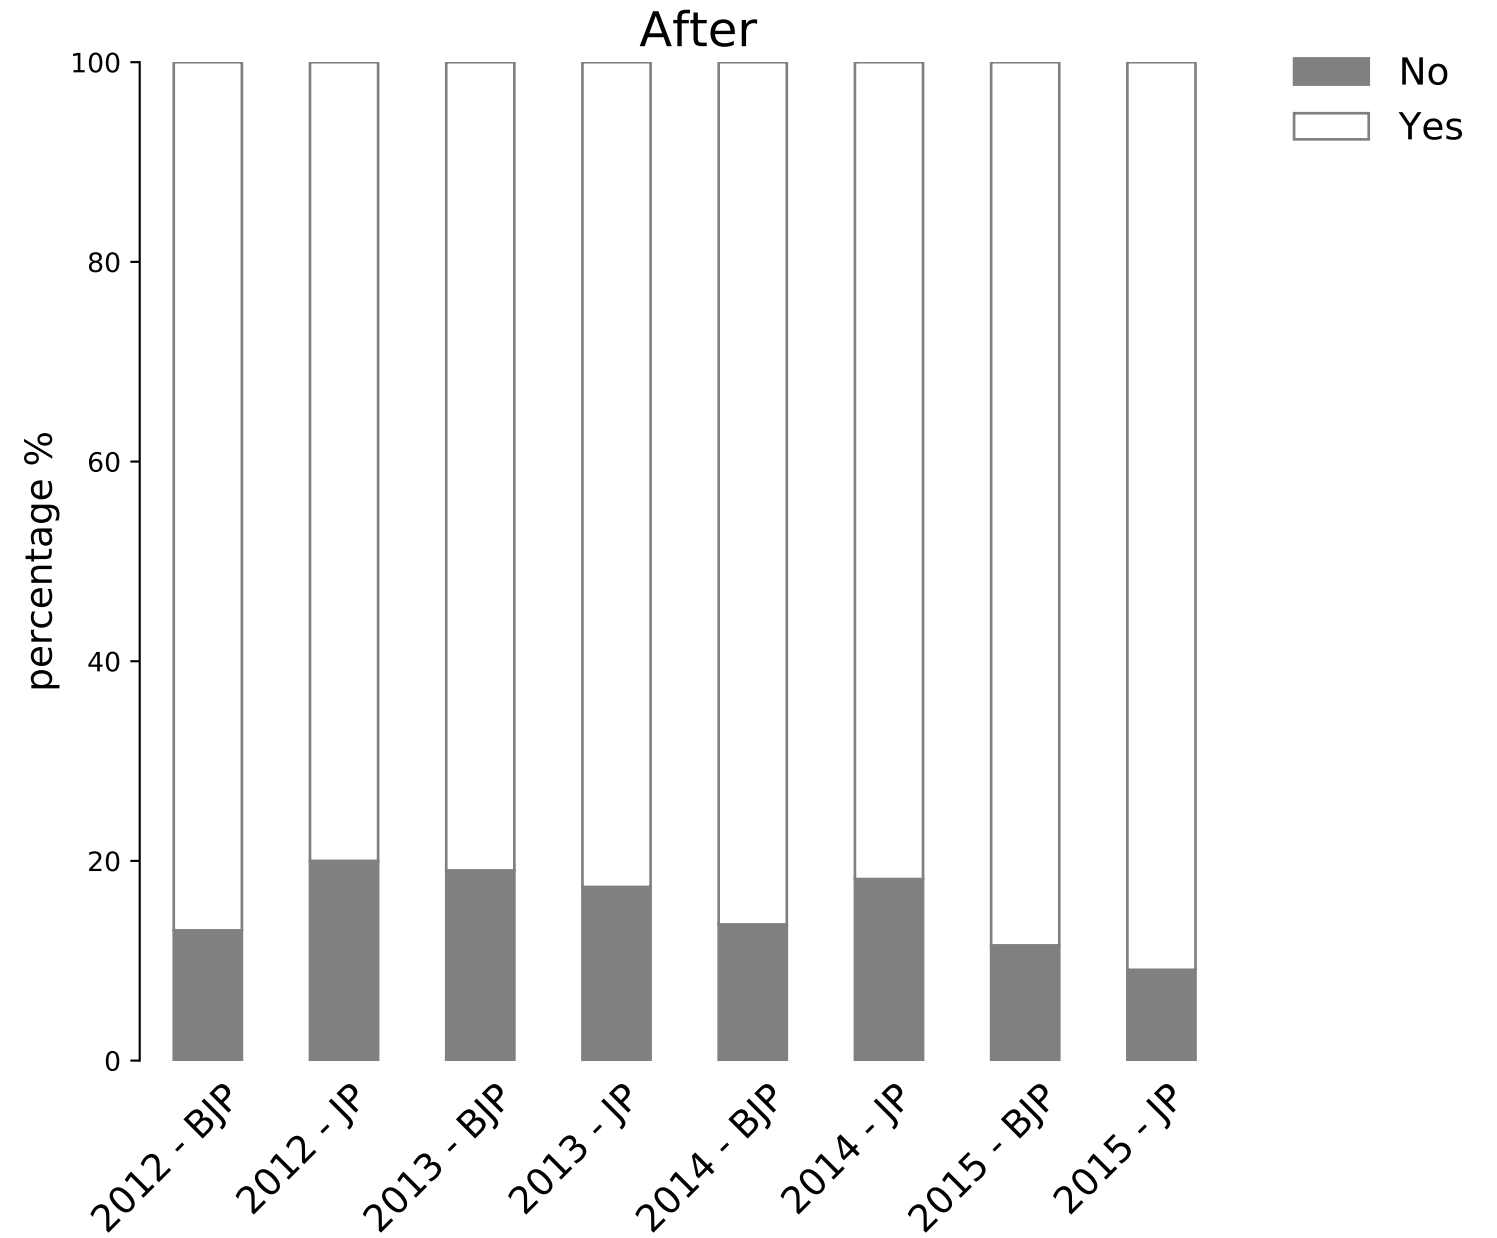

# Question 2: Are any written measures that summarize data variability SEM?

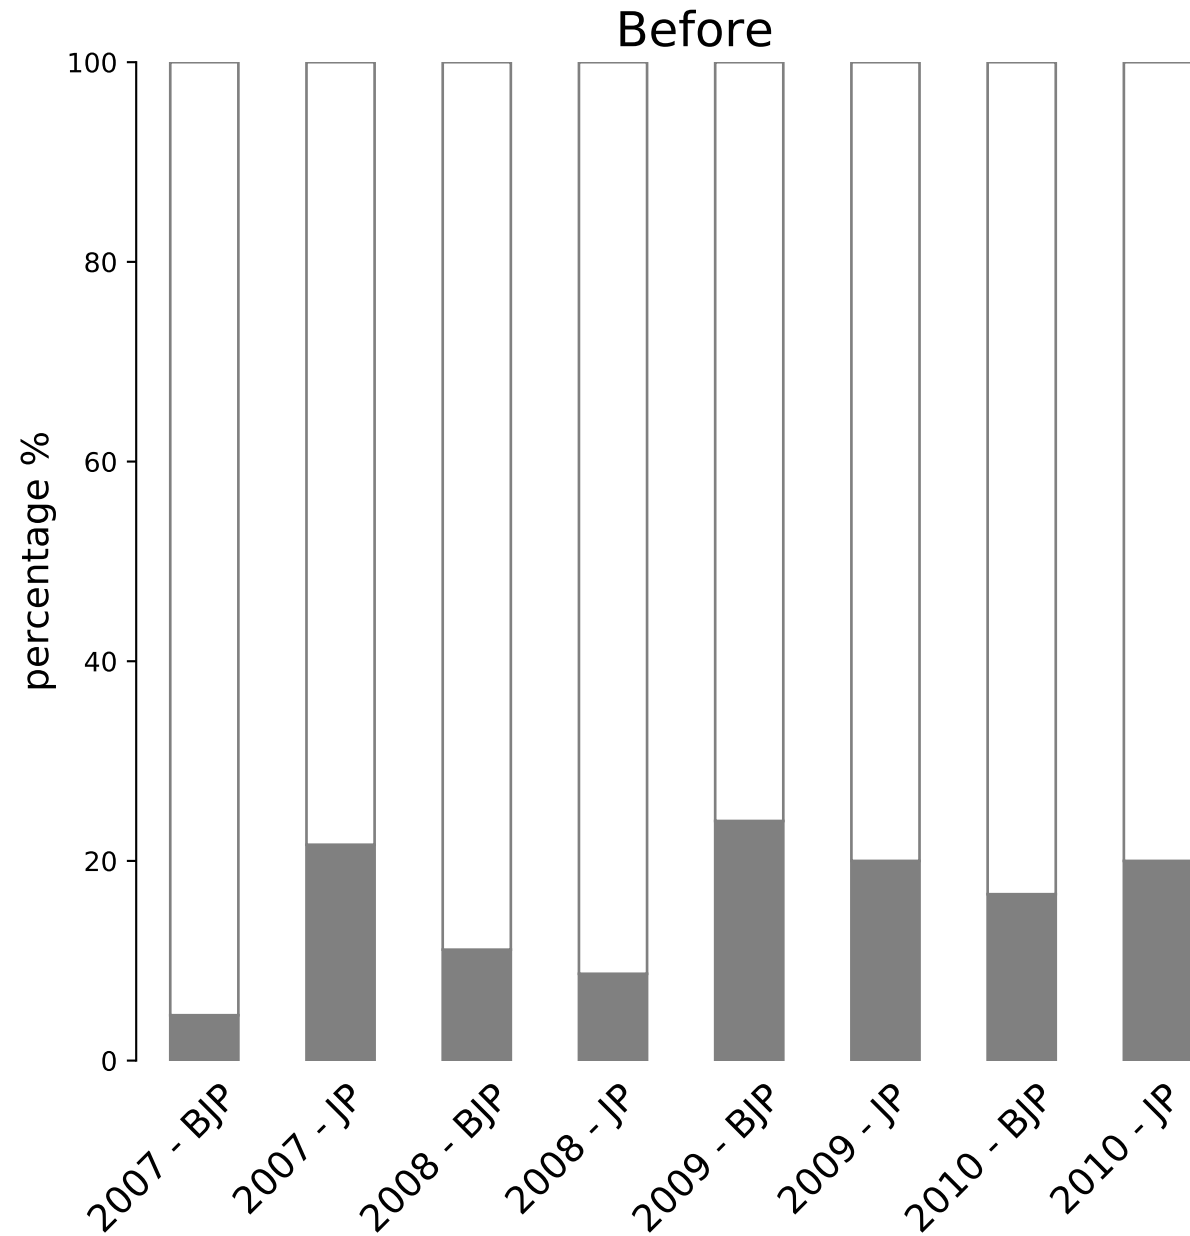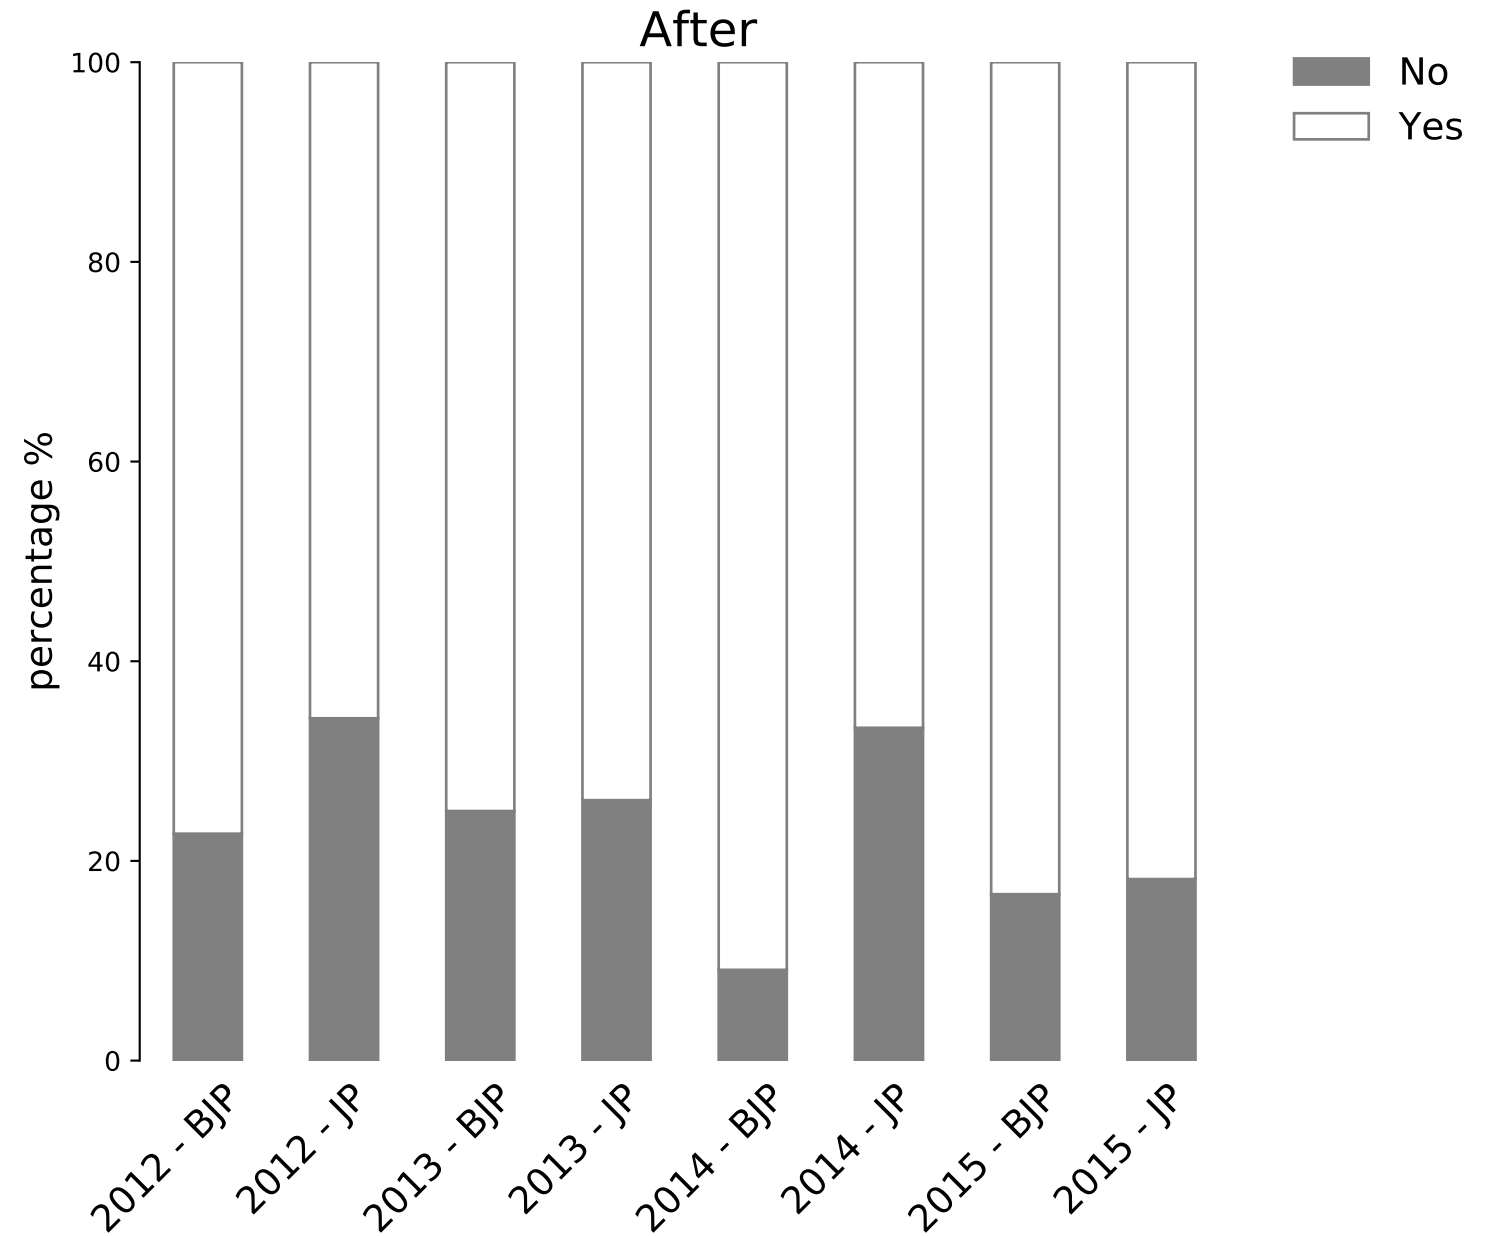

# Question 3: Are p-values for all main analyses reported or implied?

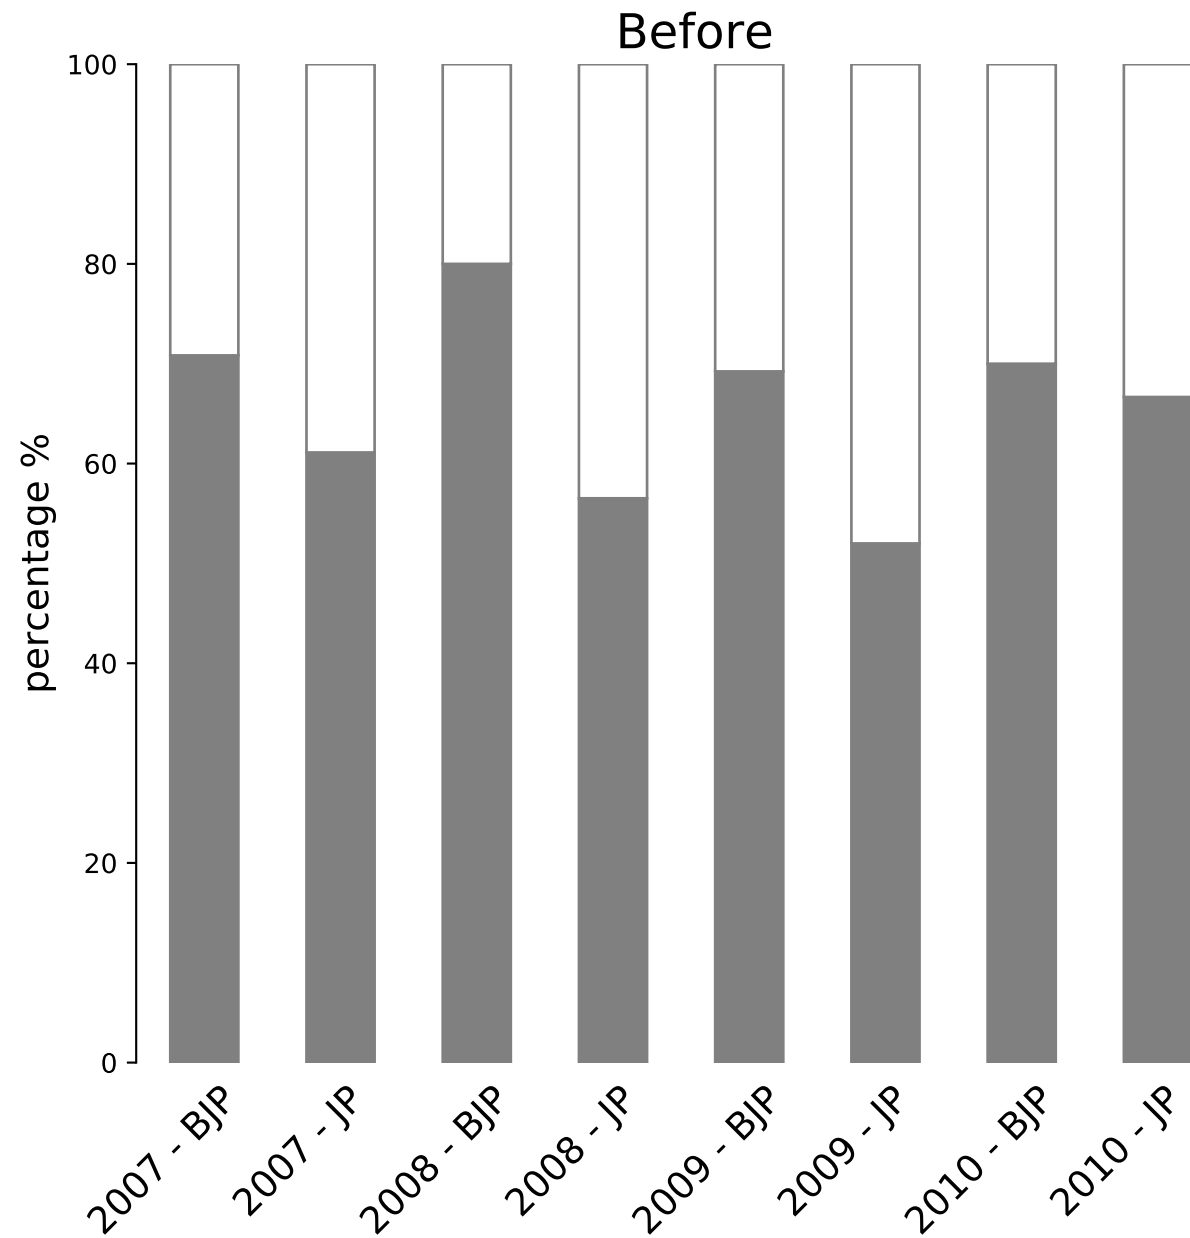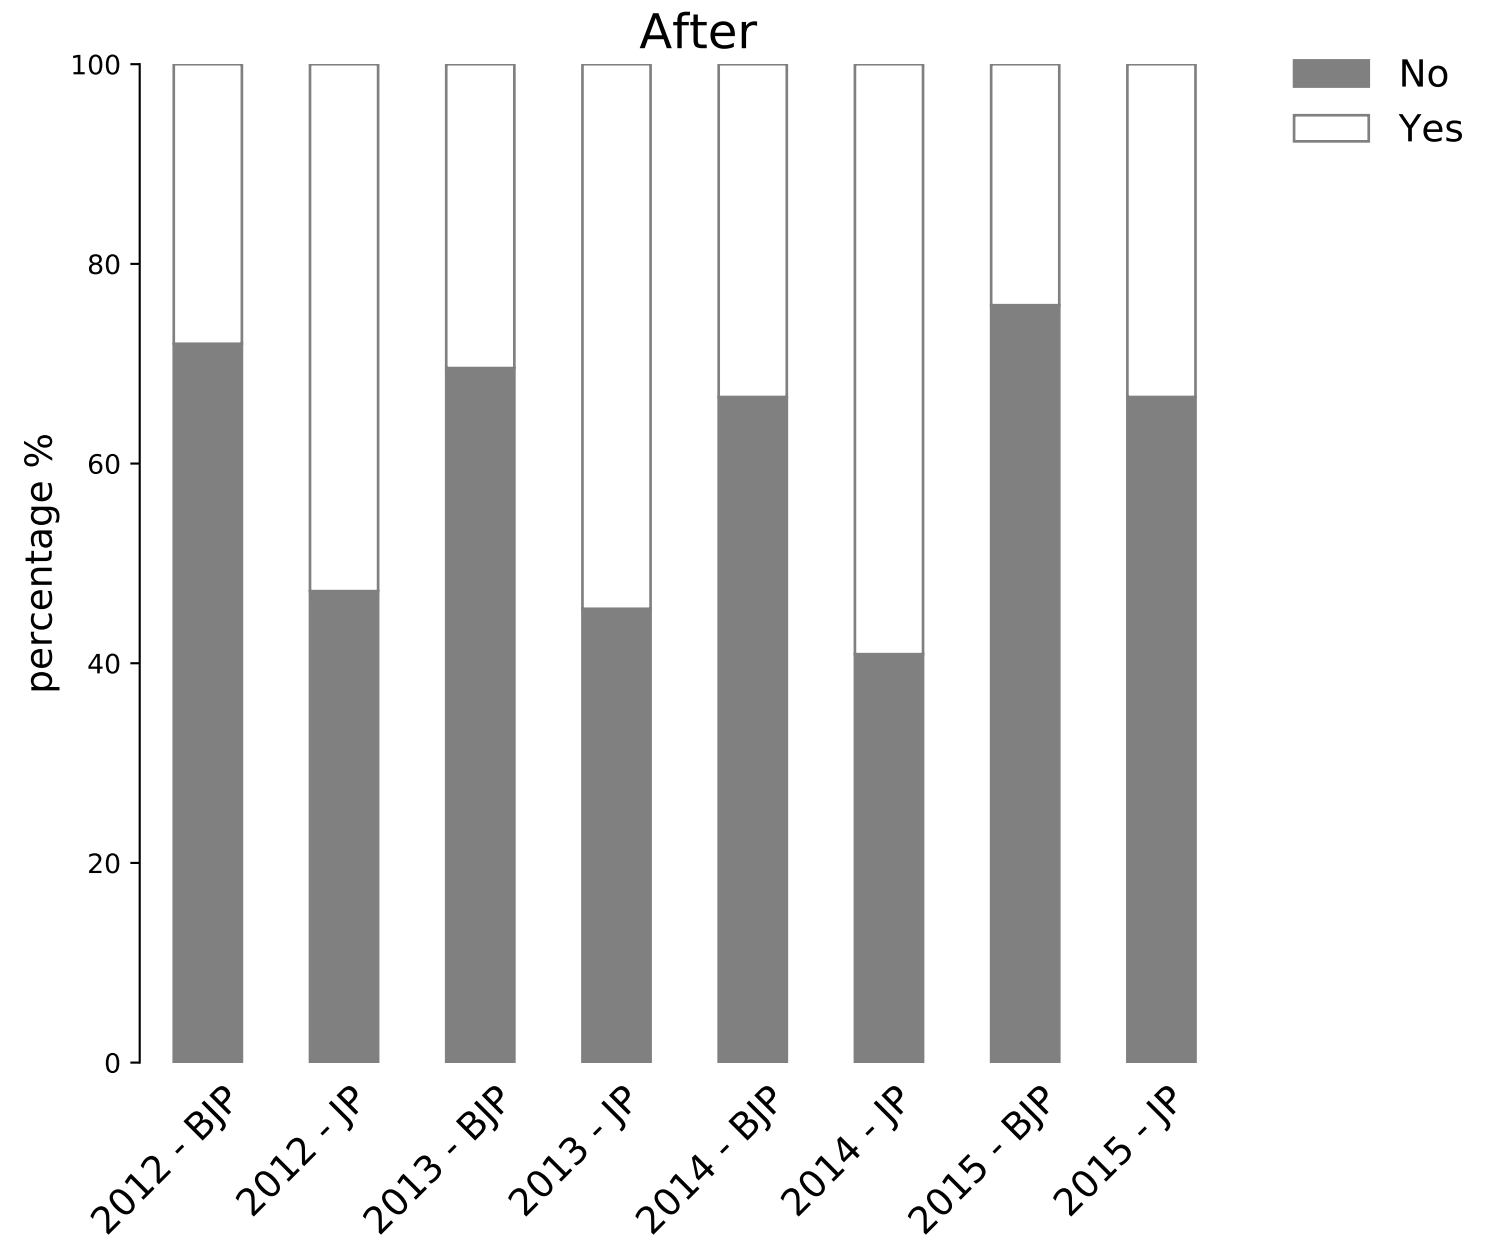

# Question 4: Are reported or implied p-values exact for main analyses?

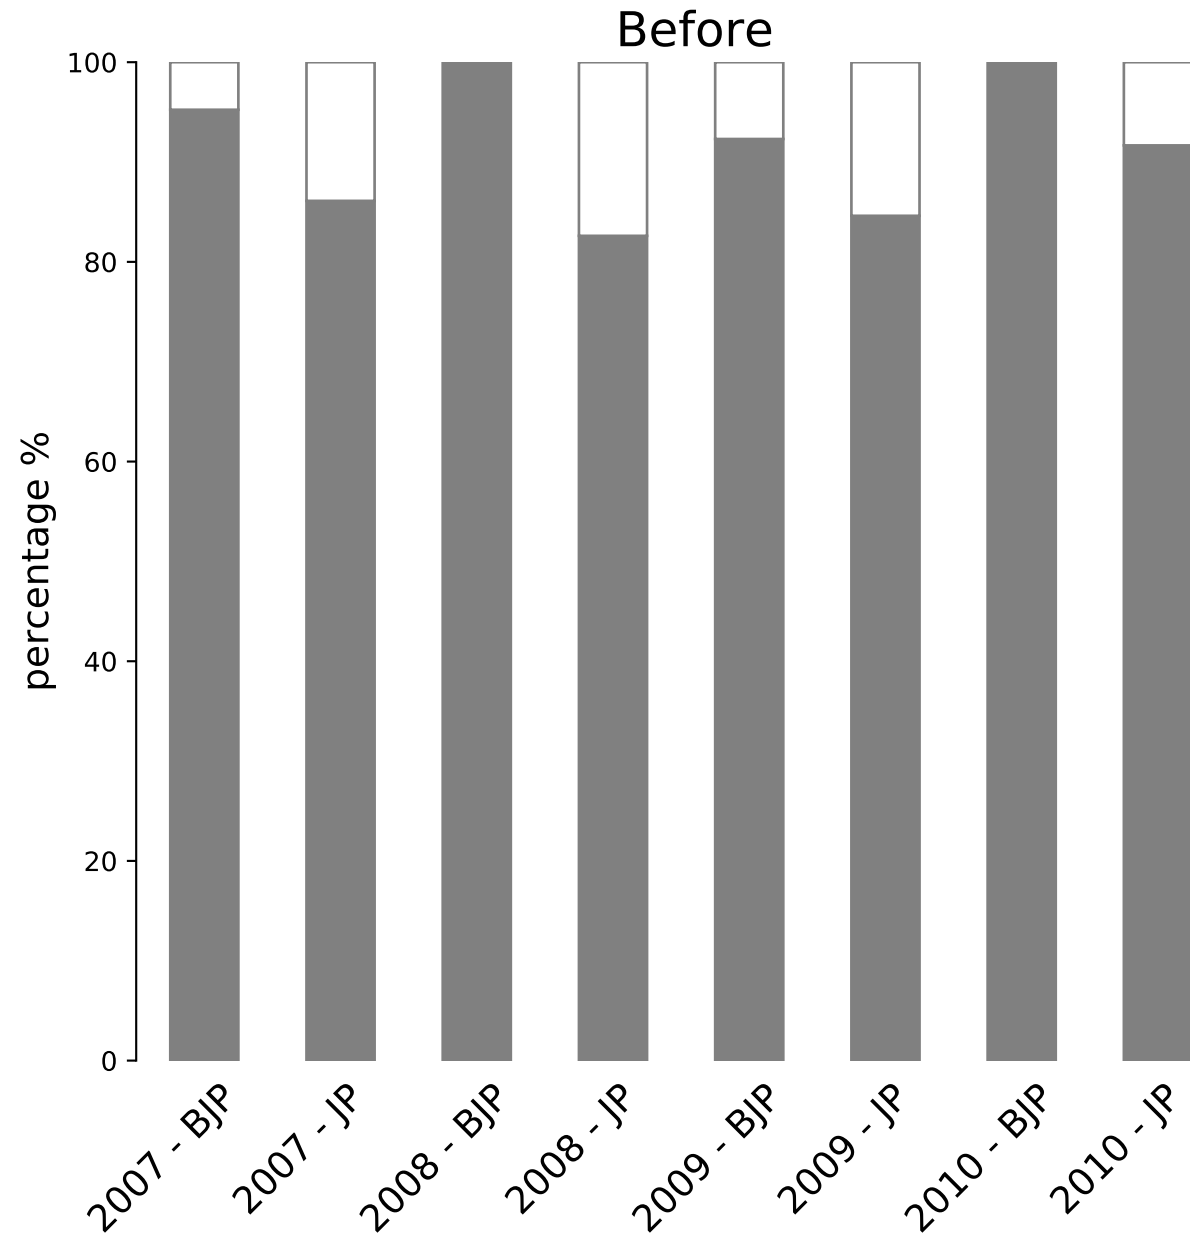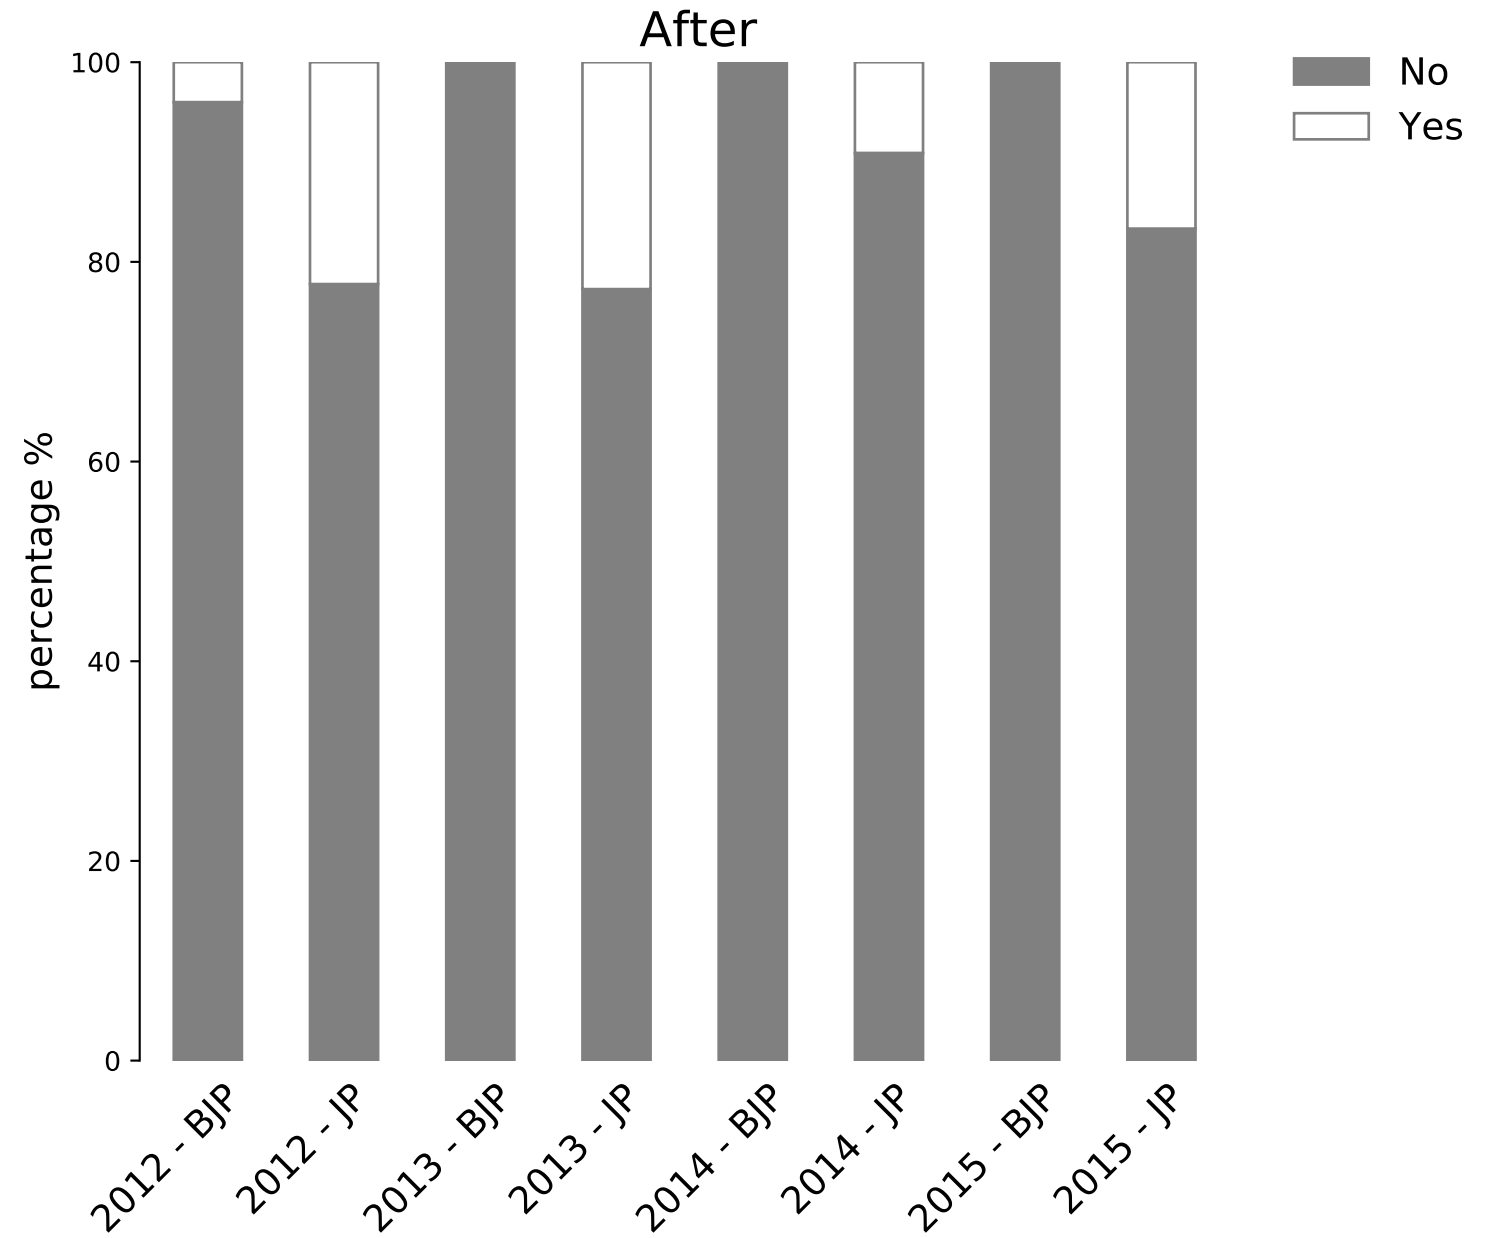

# Question 5: Are all reported or implied post-hoc p-values exact?

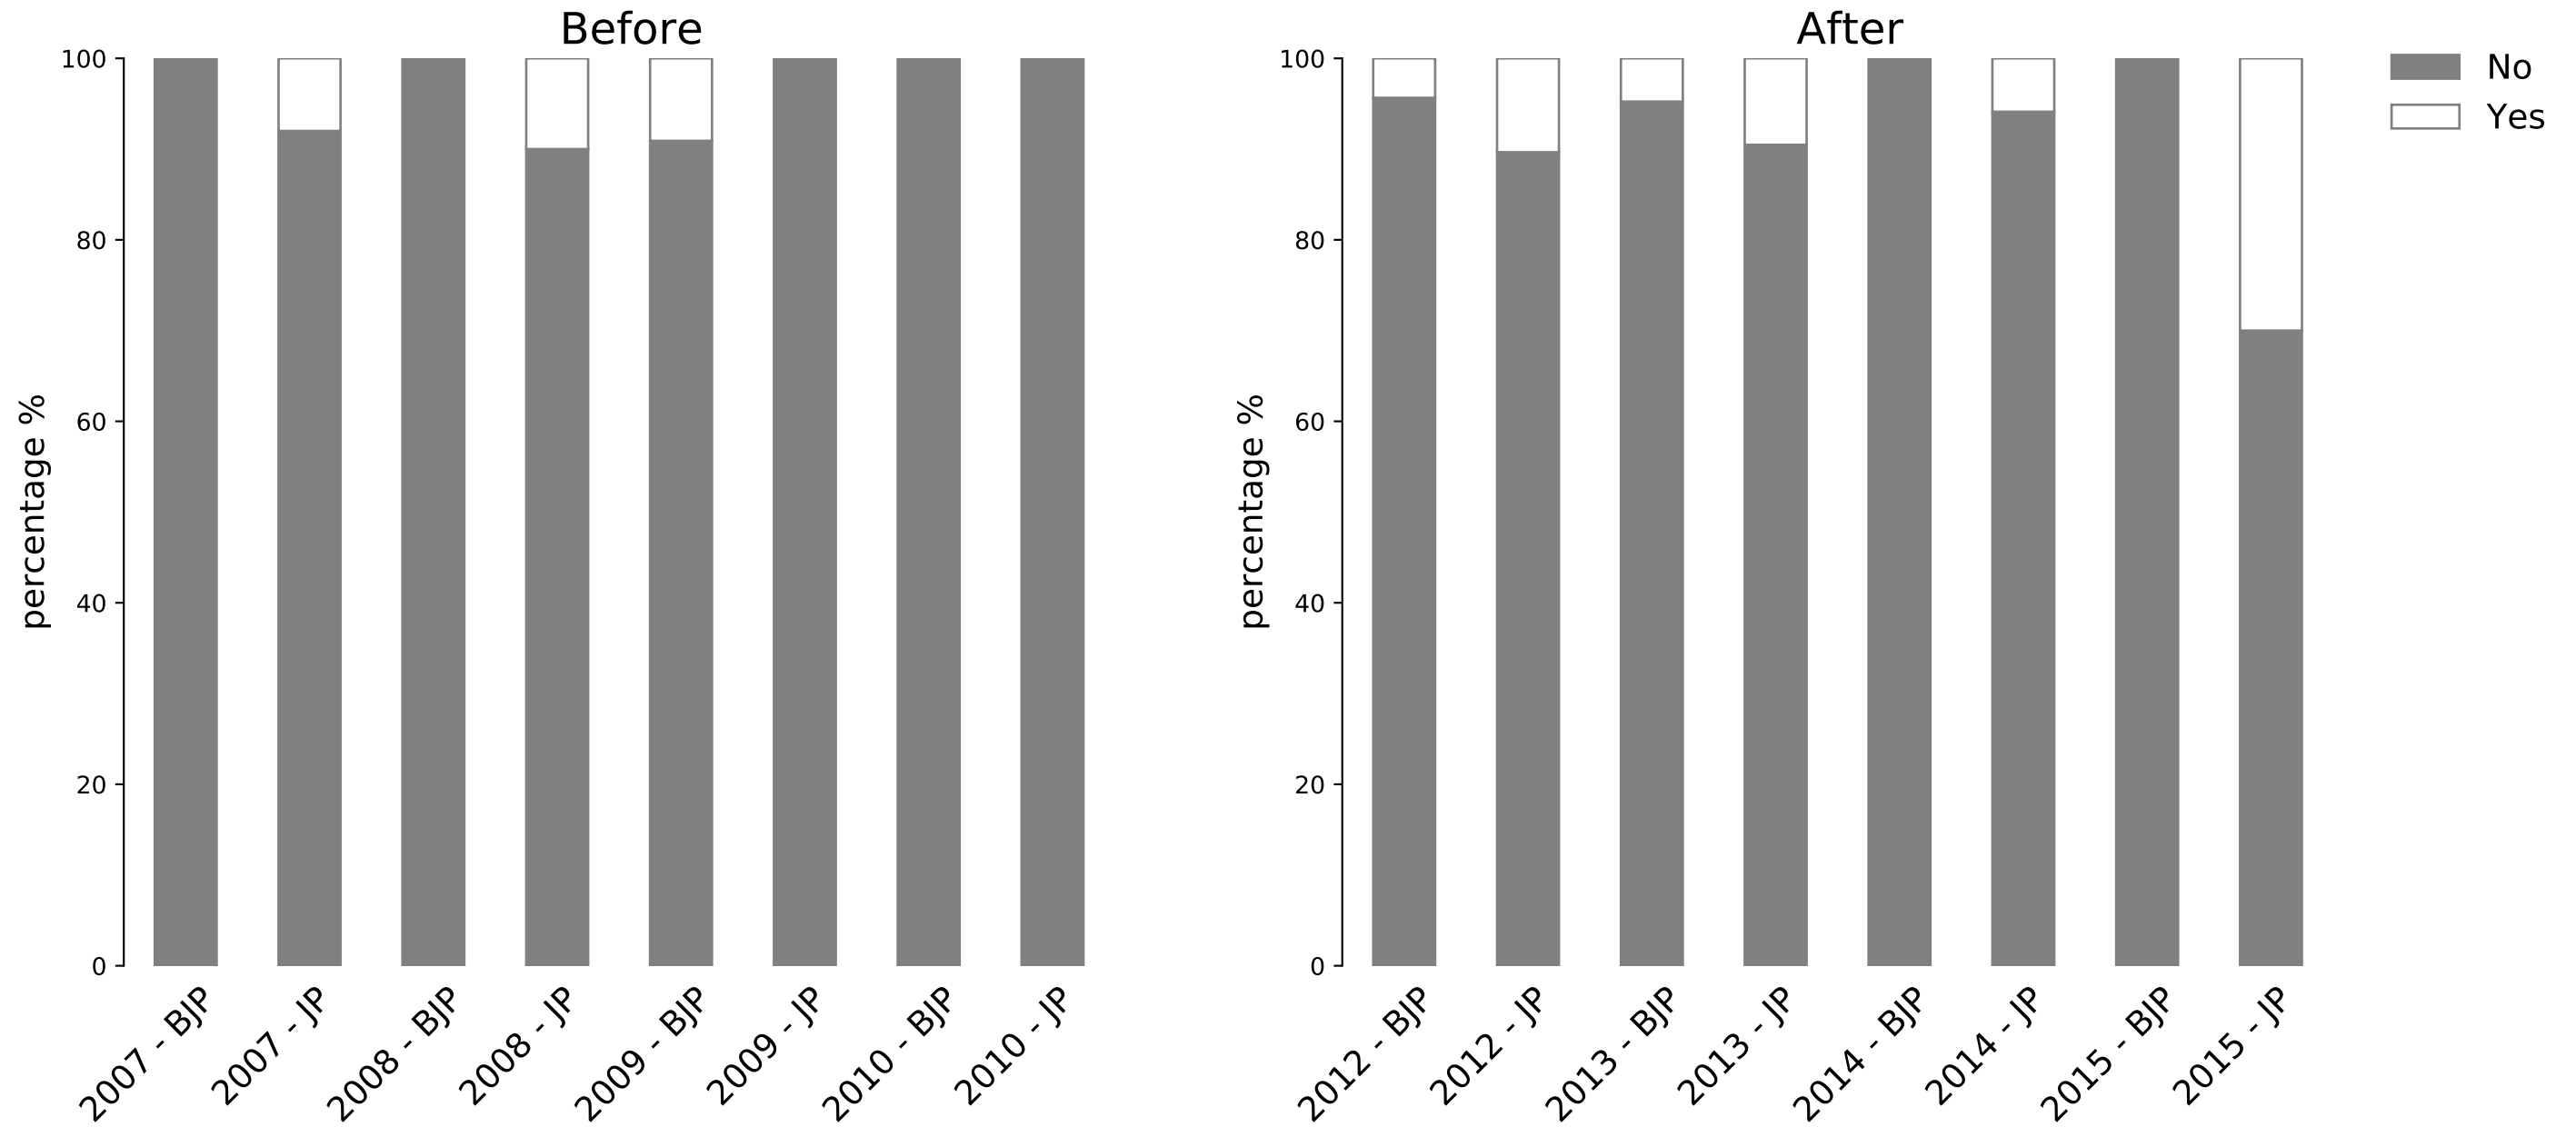

# Question 6: Are all plotted measures that summarize variability defined?

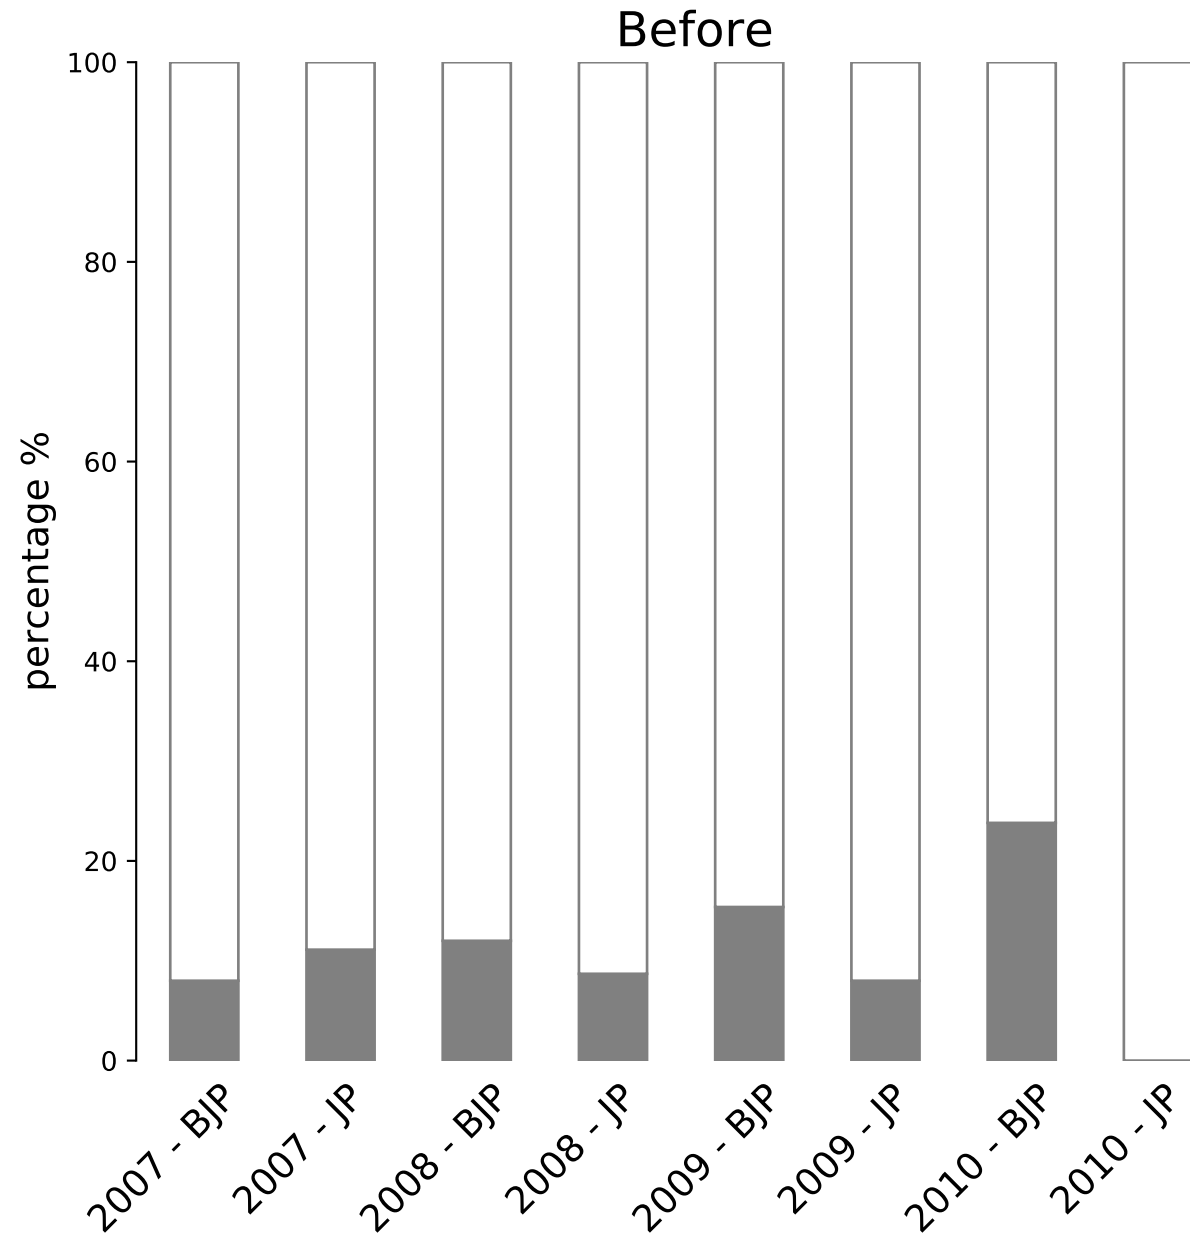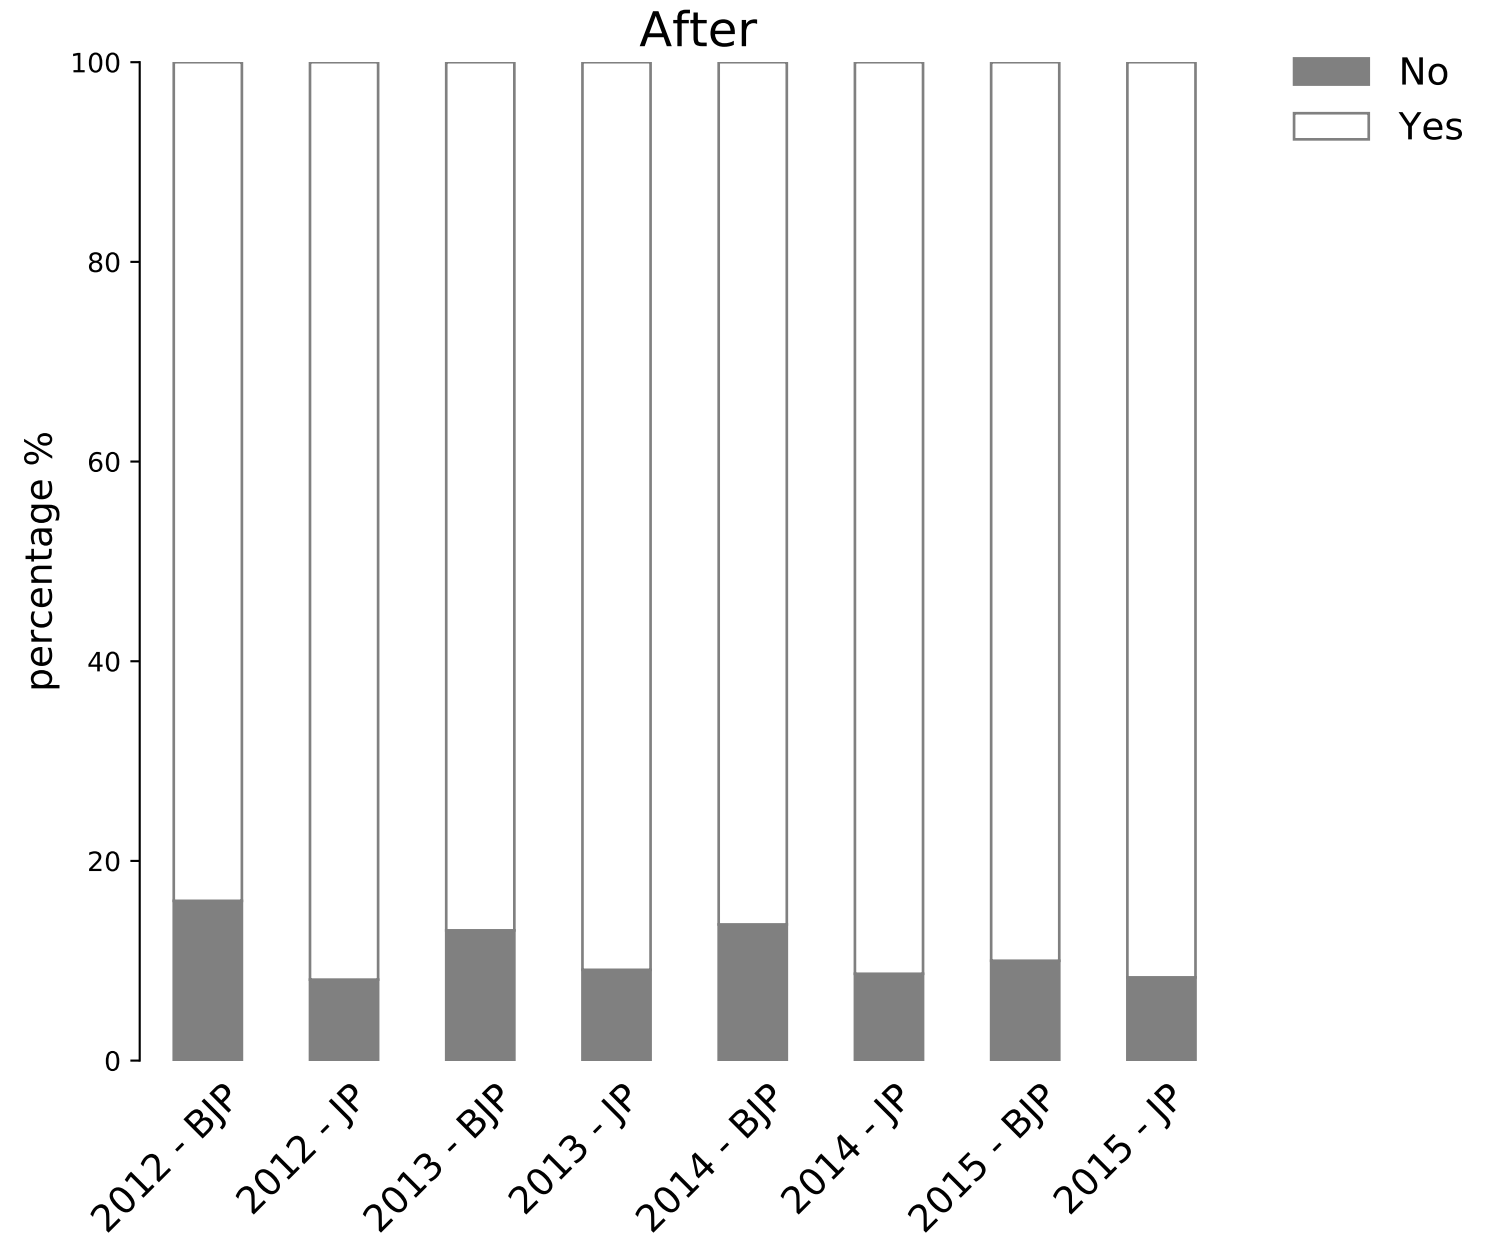

# Question 7: Are any plotted measures that summarize variability SEM?

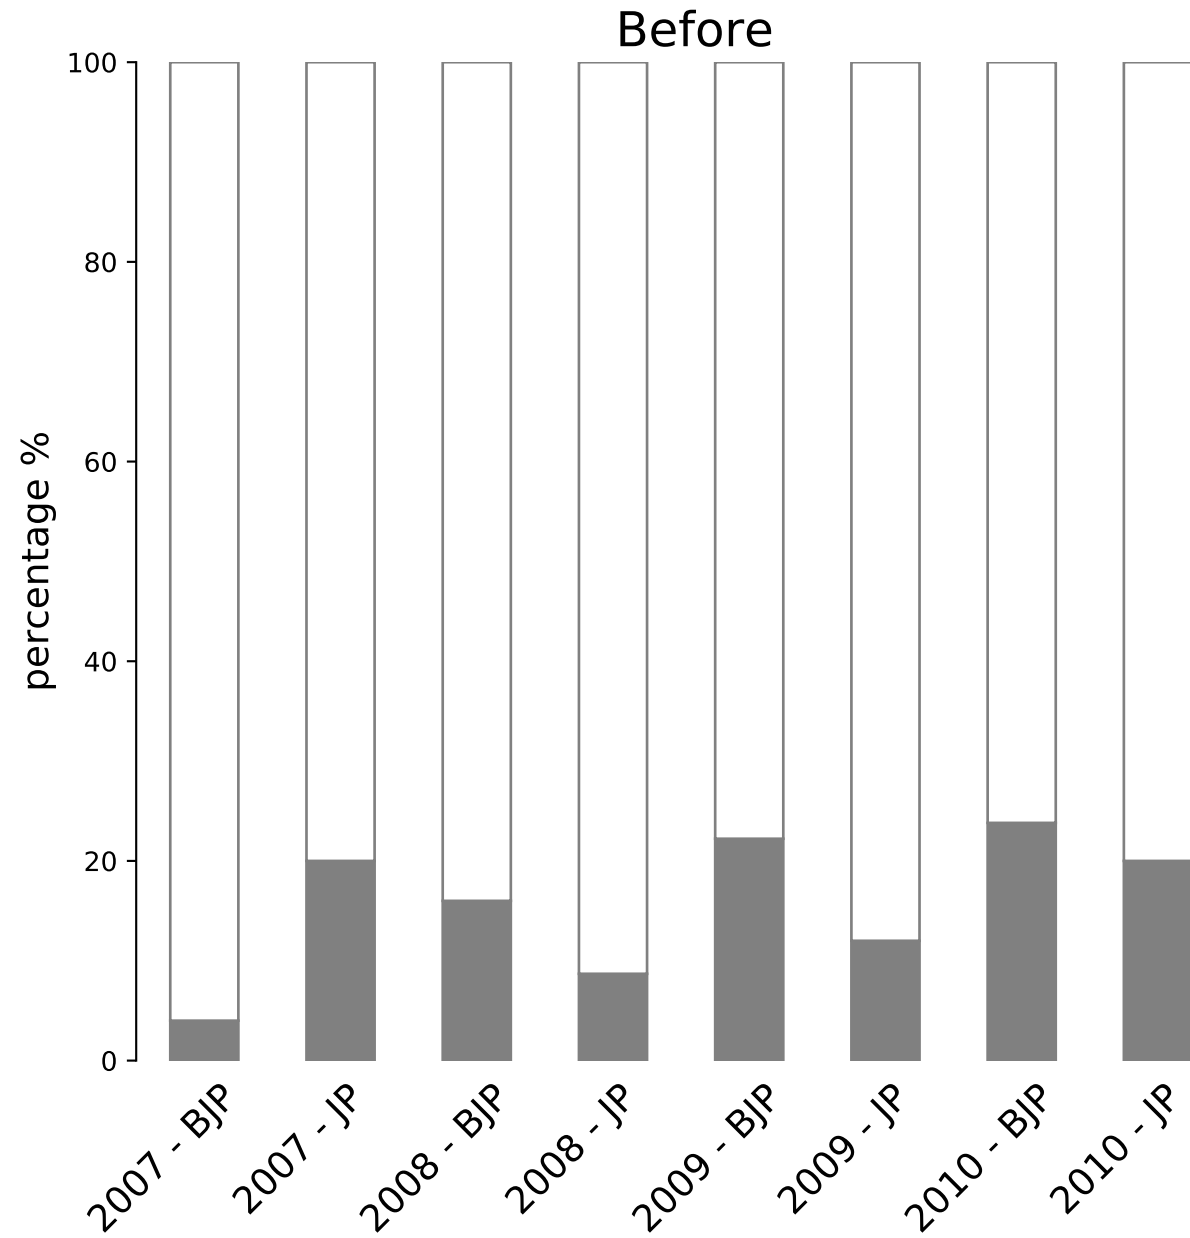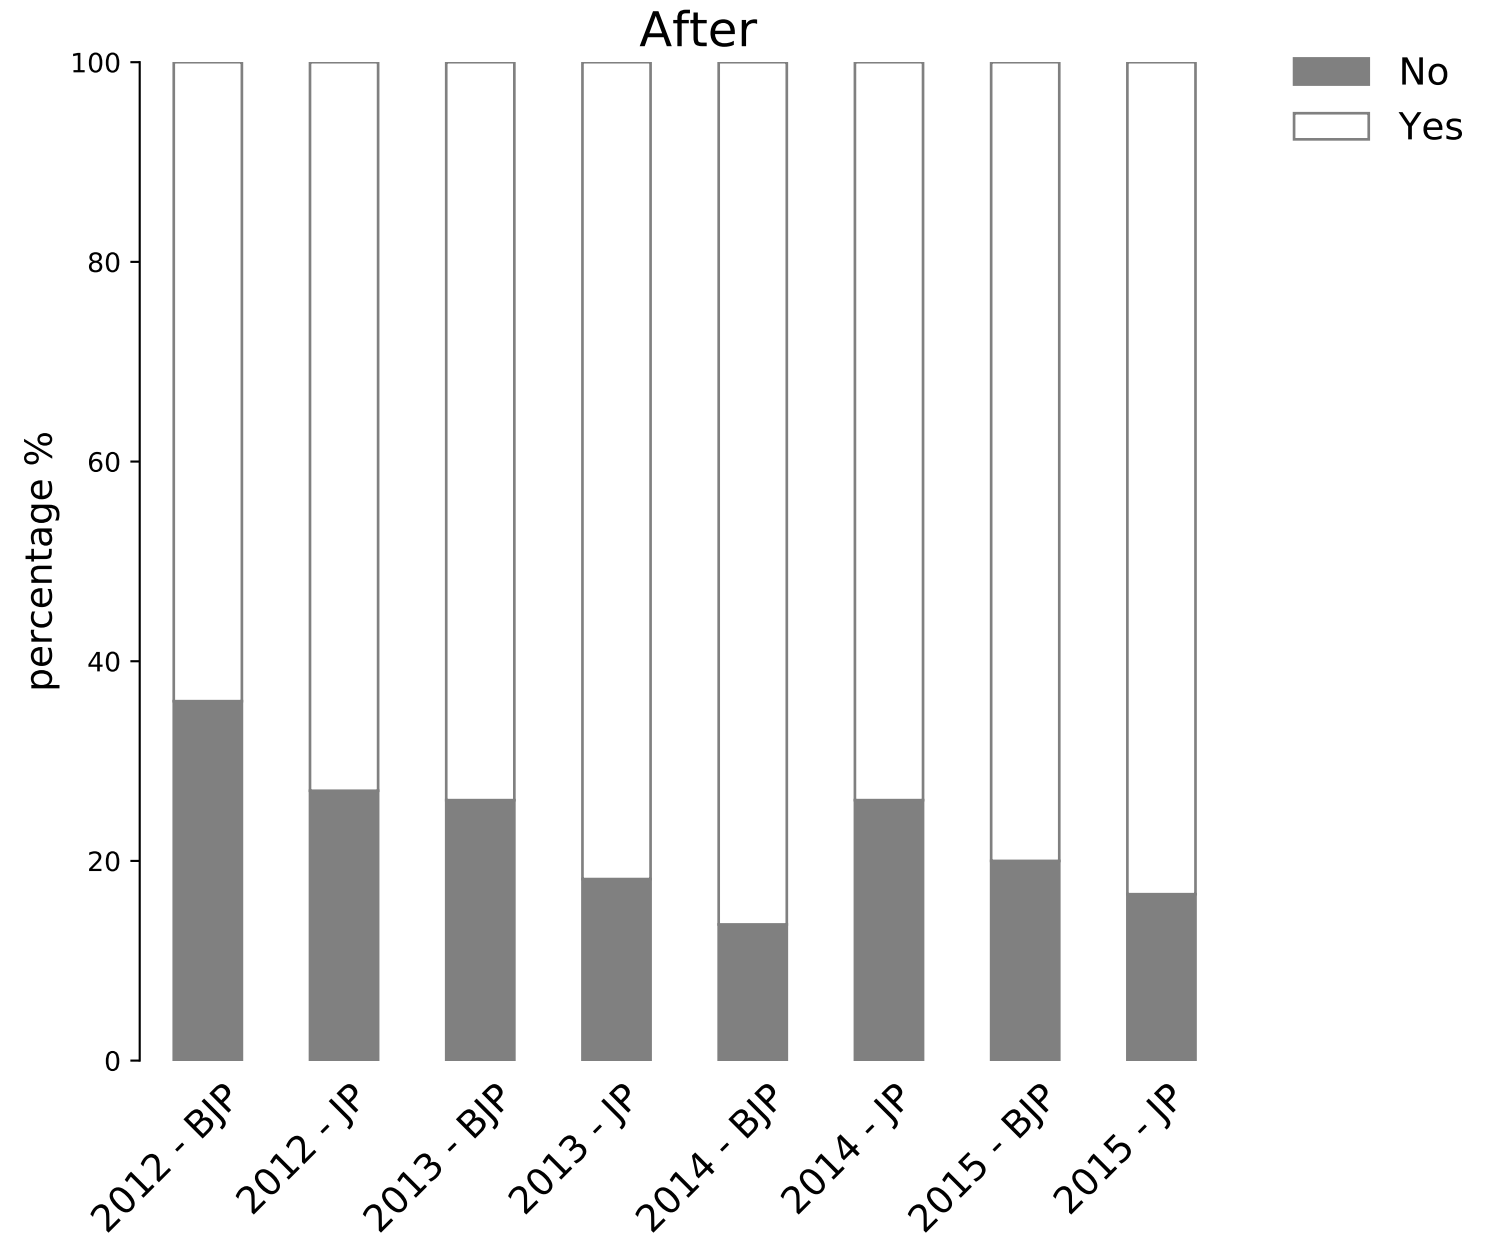

# Question 8: For all figures that summarize data/variability, are raw data plotted?

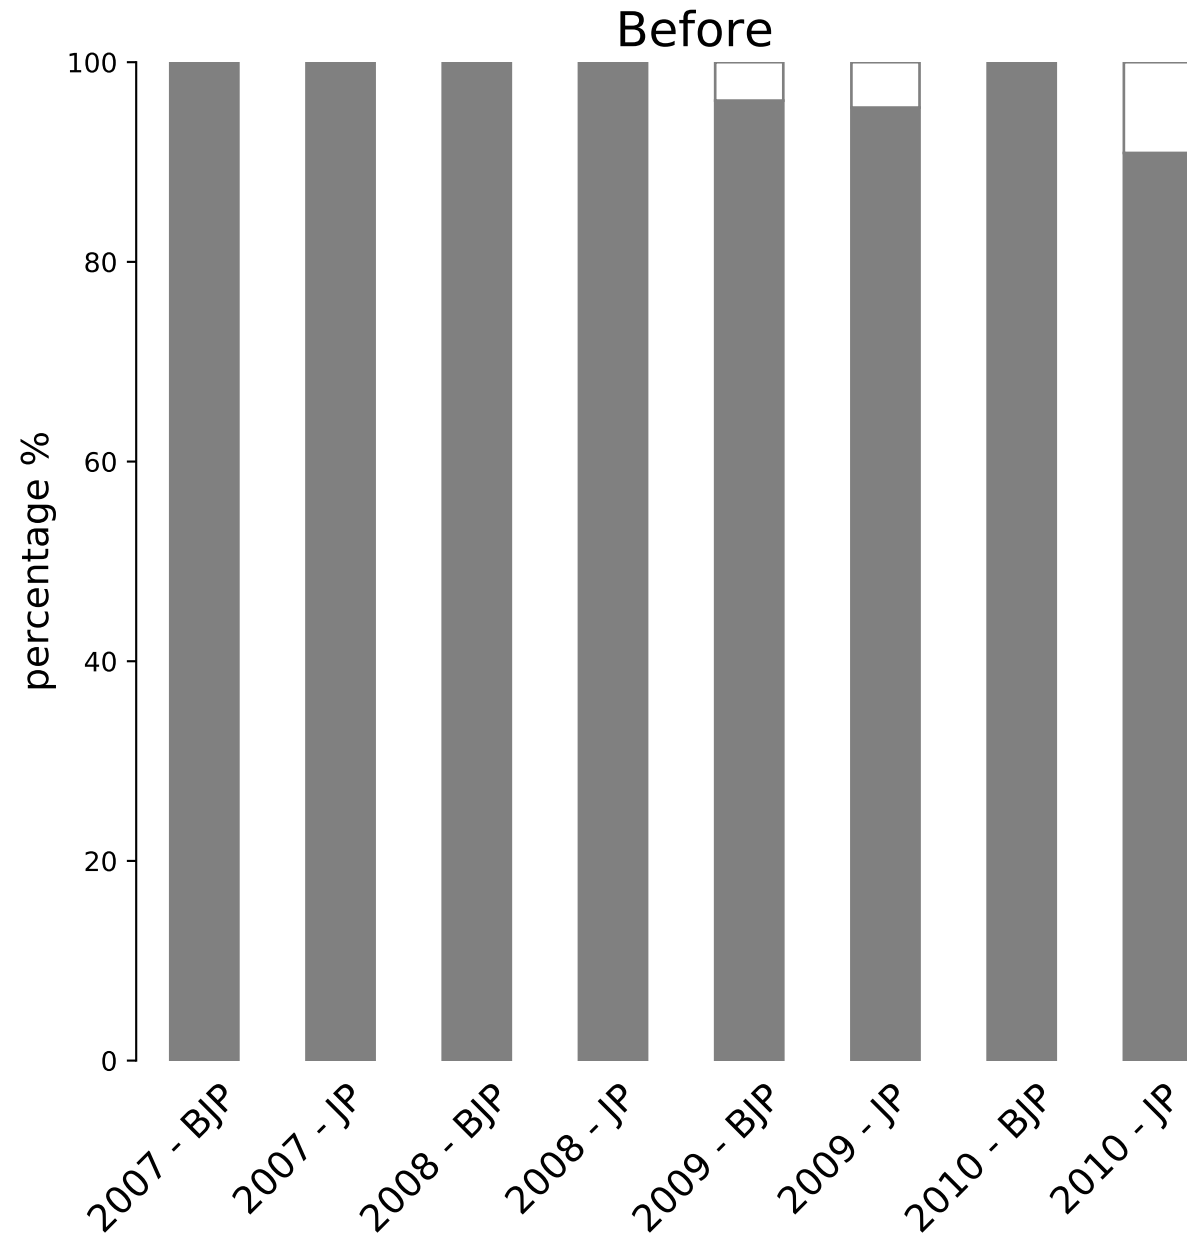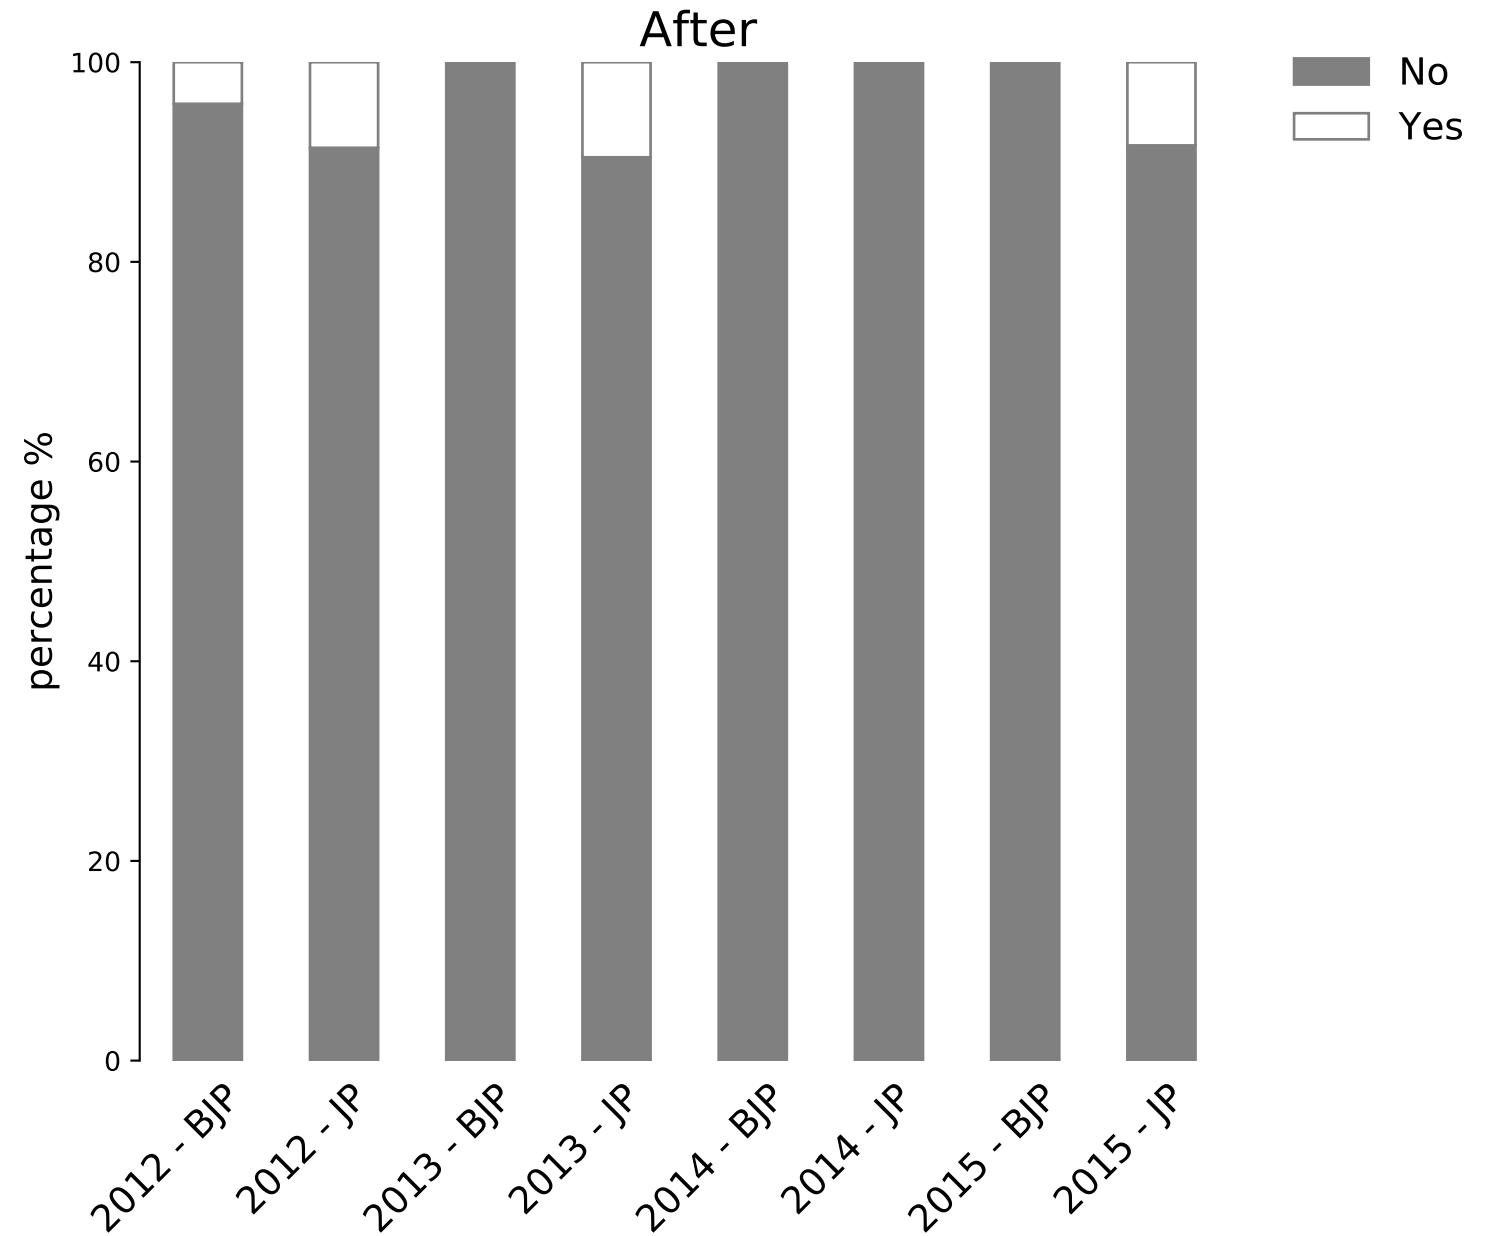



# Question 9: Does the paper report any exact p-values that are between 0.05-0.1?

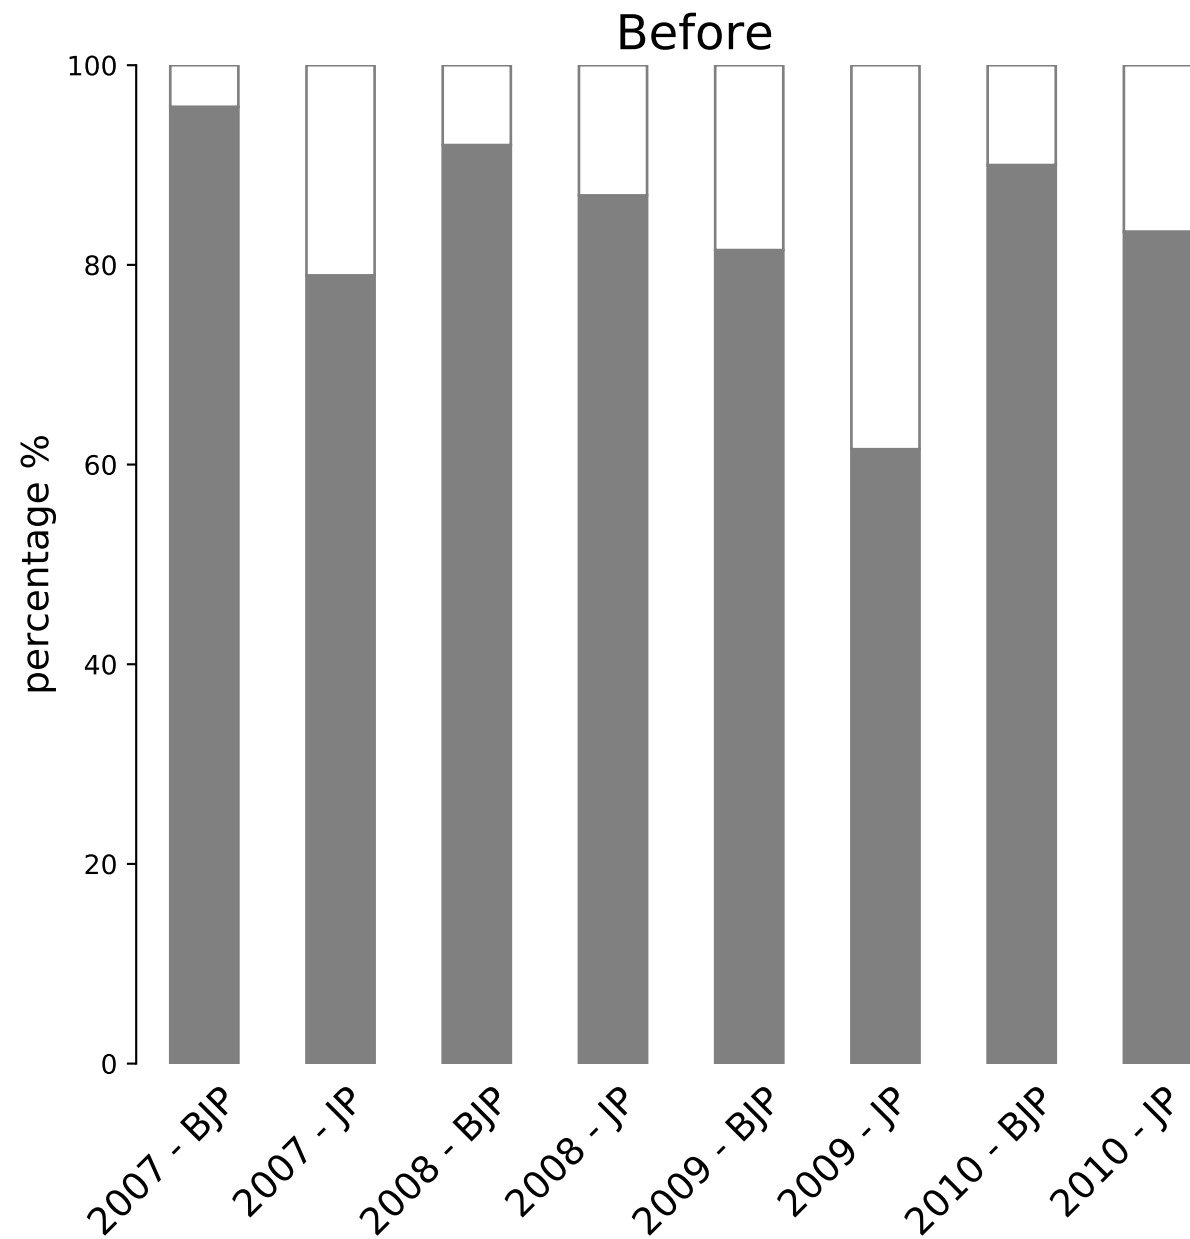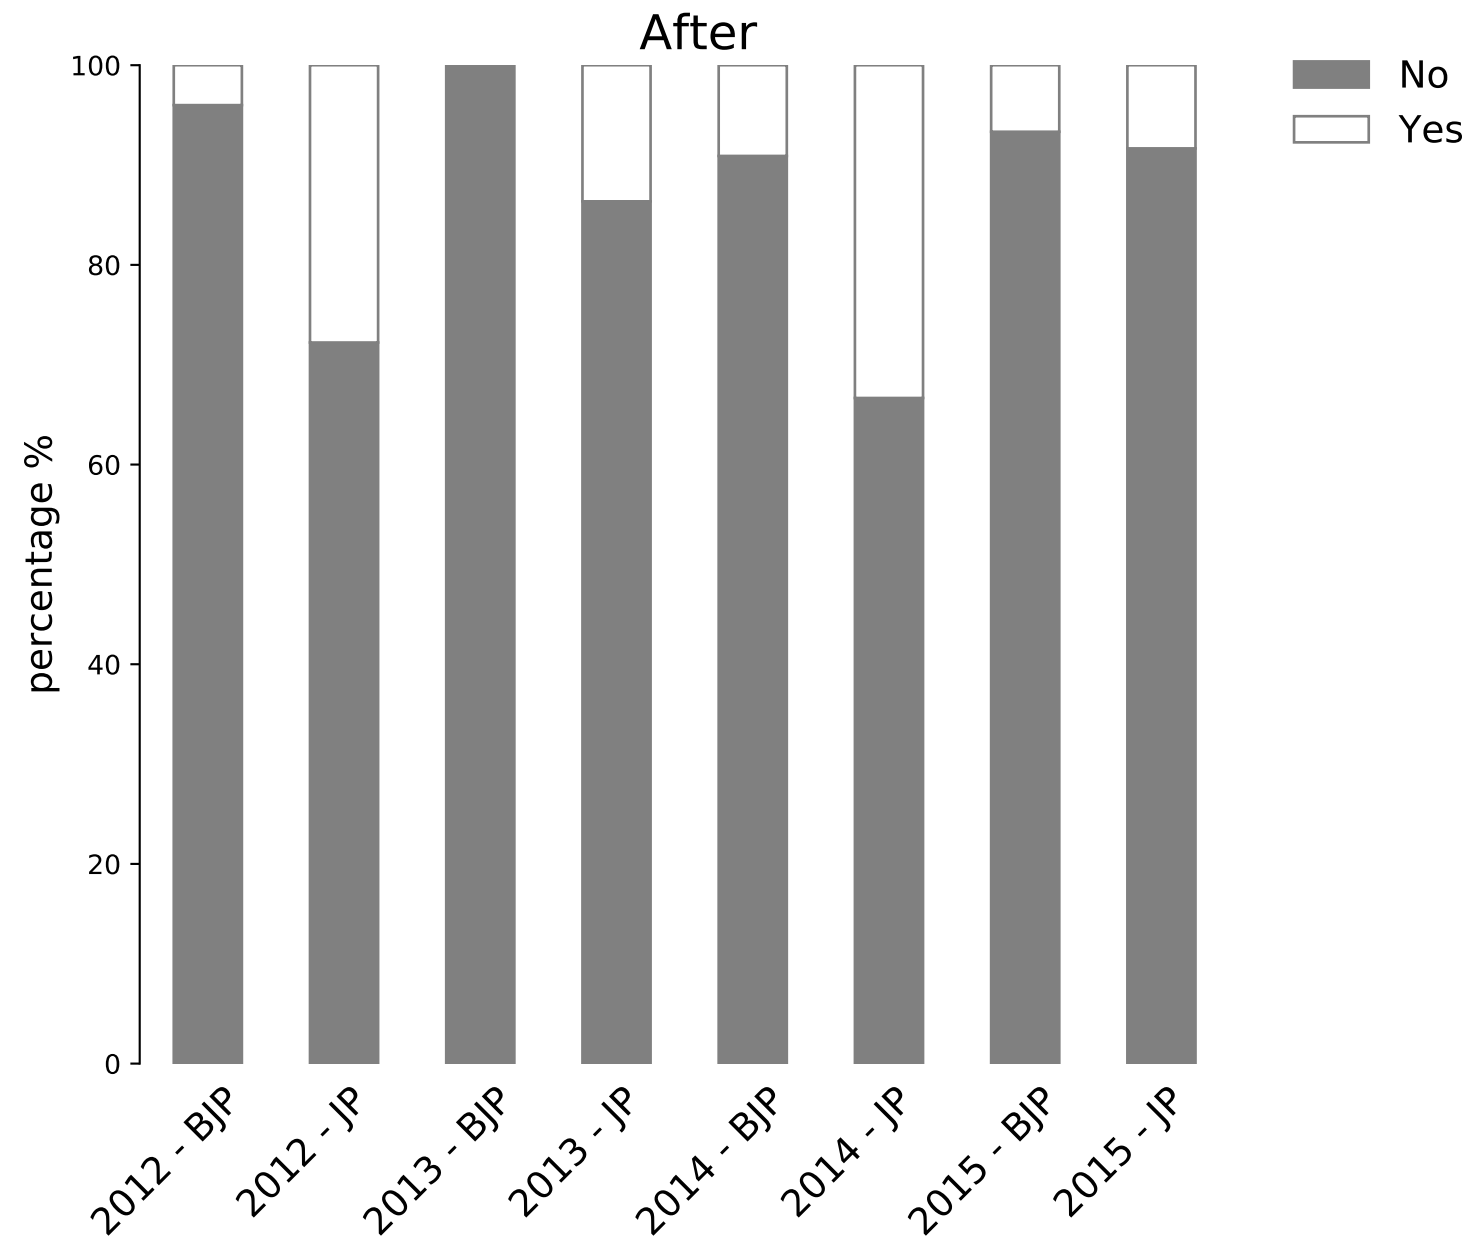

# Question 10: Are any p-values between 0.05-0.1 interpreted as trends/significance?

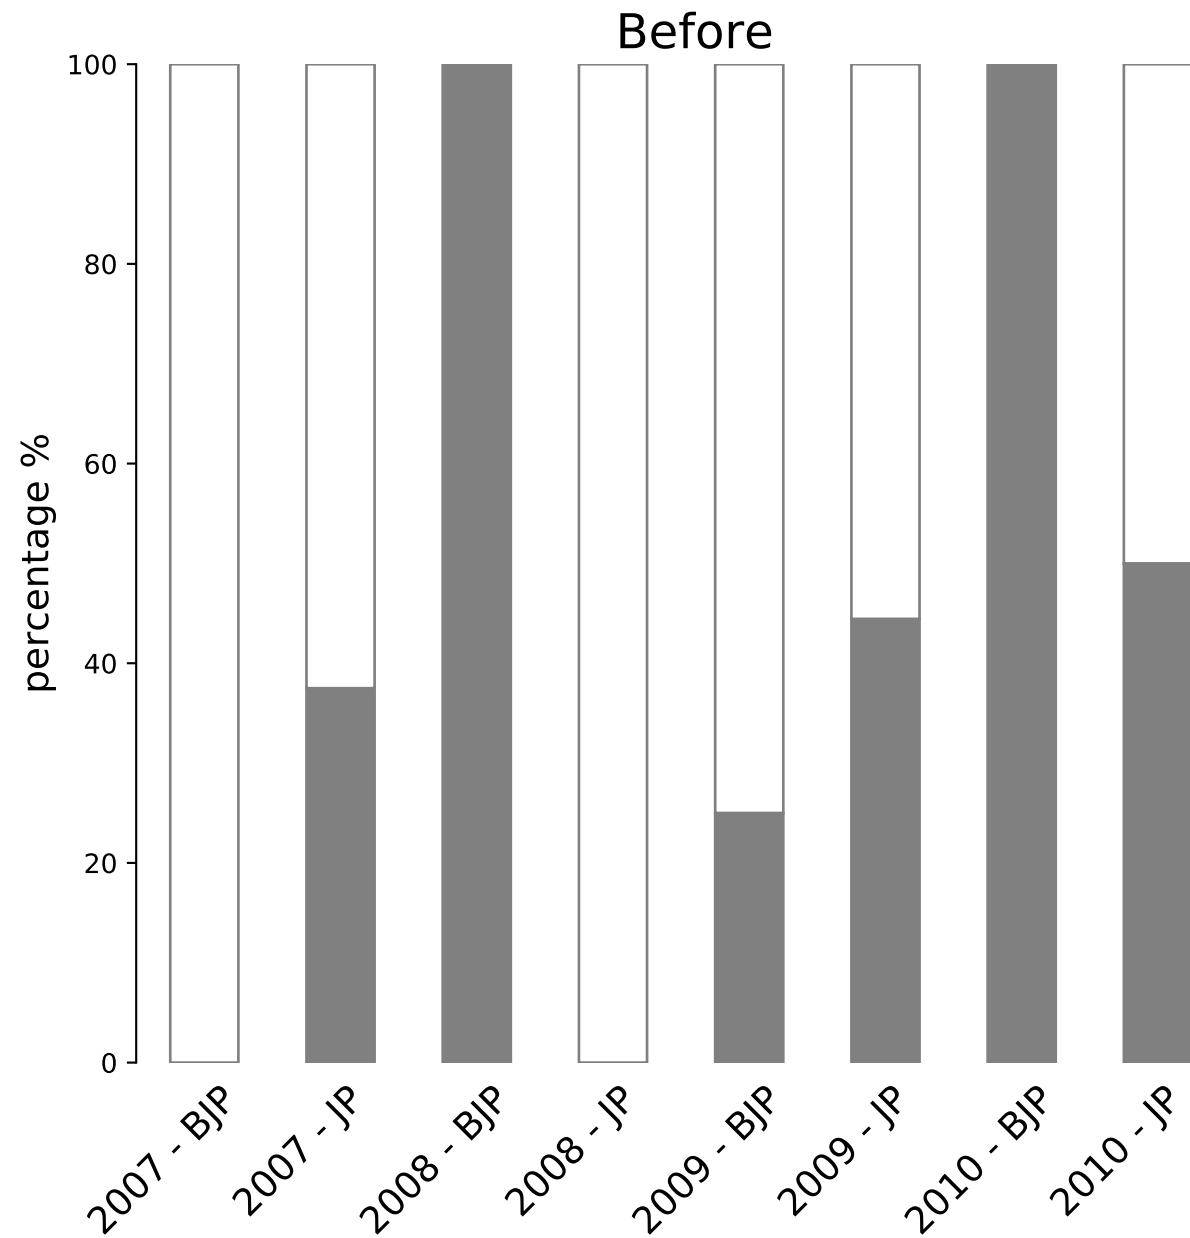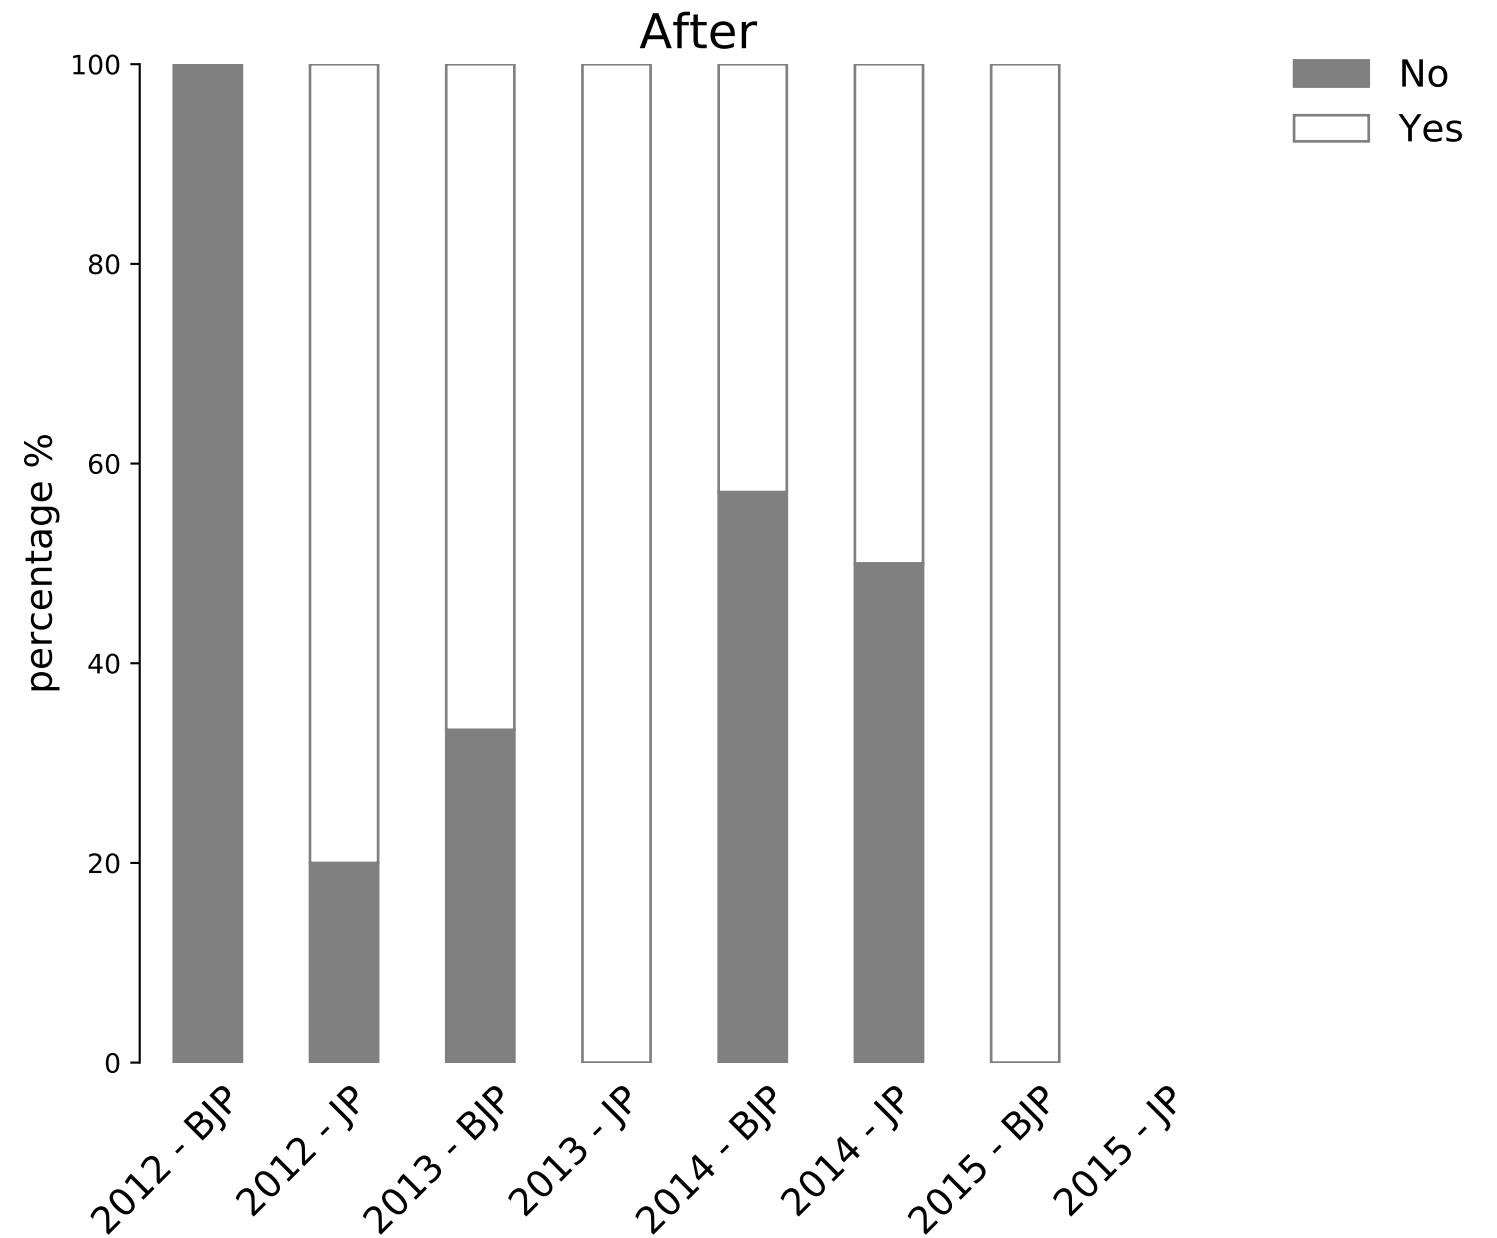

Supplement: pone.0202121.s005.pdf [file pone.0202121.s005.pdf]
