# Supplementary material for: Poor statistical reporting, inadequate data presentation and spin persist despite editorial advice
Source: PLoS One. 2018 Aug 15;13(8):e0202121. doi: 10.1371/journal.pone.0202121 (PMC6093658; doi:10.1371/journal.pone.0202121)
Supplement: S2 File — Scoring criteria and details of questions 1-10. (PDF) [file pone.0202121.s002.pdf]

**If you have a situation that you consider falls in a grey zone/area, give the benefit of the doubt to the authors.**

**If you don't think it is possible to answer a question because something is not clear, mark that question with '???' to discuss at group review.**

**Q1** Are **all** written measures that summarize data variability defined?

**Q2** Are **any** written measures that summarize data variability defined as SEM?

**Q3** When null-hypothesis testing is used, are p-values for **all** primary analyses, main effects and interactions reported or implied?

**Q4** When null-hypothesis testing is used, are reported or implied p-values exact for **all** primary analyses, main effects and interactions?

**Q5** If ANOVA-type analyses are used, are **all** reported or implied post-hoc p-values exact?

**Q6** Are **all** plotted measures that summarize variability defined?

**Q7** Are **any** plotted measures that summarize variability defined as SEM?

**Q8** For **all** figures that plot measures that summarize data/variability, are the raw data used to calculate the variability plotted?

**Q9** Does the paper report **any** exact p-values that are between 0.05-0.1 ?

**Q10** Are **any** of the exact p-values that are between 0.05-0.1 interpreted as trends or statistical significance?

# Q1 Are *all* written measures that summarize data variability defined?

**DEFINITIONS**  
**Measures that summarize data variability.**  
These include the standard deviation (SD), the standard error of the mean (SEM), 95% CI, the interquartile or similar range (IQR) and the range.

**SCOPE**  
Numerical values reported in the main text of the article, tables or figure legends.

When authors report that 'All measures/results' or 'Measures/results' are reported as mean±SEM, mean±SD, median [IQR], etc., consider this to apply to all written measures that summarize data variability.

**POSSIBLE ANSWERS**

**NA**  
No such measures are reported.

**0 or no**  
Such measures are reported, but the type of at least one cannot be determined.

**1 or yes**  
Such measures are reported and the type of all measures can be determined.

| 0 (no)                                                                                                                                                                                                            | 1 (yes)                                                                                                                                                                       |           |           |        |         |         |         |        |                                                                                                                                                                                                                                    |       |            |           |        |         |         |         |        |
|-------------------------------------------------------------------------------------------------------------------------------------------------------------------------------------------------------------------|-------------------------------------------------------------------------------------------------------------------------------------------------------------------------------|-----------|-----------|--------|---------|---------|---------|--------|------------------------------------------------------------------------------------------------------------------------------------------------------------------------------------------------------------------------------------|-------|------------|-----------|--------|---------|---------|---------|--------|
| "Their mean age was 27.3 (4.5)."                                                                                                                                                                                  | "Their mean age was 27.3 (4.5) (mean (SD))."                                                                                                                                  |           |           |        |         |         |         |        |                                                                                                                                                                                                                                    |       |            |           |        |         |         |         |        |
| "The cats weighed 1.6±0.4 kg (mean ±SEM), and the amount of food they ate varied considerably (100 g/day [50-375])."                                                                                              | "The cats weighed 1.6±0.4 kg (mean ±SEM), and the amount of food they ate varied considerably (100 g/day [50-375]; median [range])."                                          |           |           |        |         |         |         |        |                                                                                                                                                                                                                                    |       |            |           |        |         |         |         |        |
| "Their mean age was 32±4. Stimulus intensity was adjusted for each subjects (1.3±0.4mA) before the start of the next trial. [...] The effect of brain stimulation on hot dog cravings is reported as mean ± SEM." | "Their mean age was 32±4. Stimulus intensity was adjusted for each subjects (1.3±0.4mA) before the start of the next trial. [...] Results are reported as mean ± SEM."        |           |           |        |         |         |         |        |                                                                                                                                                                                                                                    |       |            |           |        |         |         |         |        |
| " <b>Figure 3. Response rate.</b> There was a marked increase in the response rate of blue turtles (a). This may reflect their slow cervical reflex (23.4±4.8 ms)."                                               | " <b>Figure 3. Response rate.</b> There was a marked increase in the response rate of blue turtles (a). This may reflect their slow cervical reflex (23.4±4.8 ms; mean±SEM)." |           |           |        |         |         |         |        |                                                                                                                                                                                                                                    |       |            |           |        |         |         |         |        |
| <b>TABLE 1.</b> <table><tr><th>GROUP</th><th>IQ SCORES</th></tr><tr><td>treatment</td><td>98 (5)</td></tr><tr><td>control</td><td>106 (7)</td></tr><tr><td>placebo</td><td>94 (4)</td></tr></table>               | GROUP                                                                                                                                                                         | IQ SCORES | treatment | 98 (5) | control | 106 (7) | placebo | 94 (4) | <b>TABLE 1.</b> <table><tr><th>GROUP</th><th>IQ SCORES*</th></tr><tr><td>treatment</td><td>98 (5)</td></tr><tr><td>control</td><td>106 (7)</td></tr><tr><td>placebo</td><td>94 (4)</td></tr></table> <p>* values are mean (SD)</p> | GROUP | IQ SCORES* | treatment | 98 (5) | control | 106 (7) | placebo | 94 (4) |
| GROUP                                                                                                                                                                                                             | IQ SCORES                                                                                                                                                                     |           |           |        |         |         |         |        |                                                                                                                                                                                                                                    |       |            |           |        |         |         |         |        |
| treatment                                                                                                                                                                                                         | 98 (5)                                                                                                                                                                        |           |           |        |         |         |         |        |                                                                                                                                                                                                                                    |       |            |           |        |         |         |         |        |
| control                                                                                                                                                                                                           | 106 (7)                                                                                                                                                                       |           |           |        |         |         |         |        |                                                                                                                                                                                                                                    |       |            |           |        |         |         |         |        |
| placebo                                                                                                                                                                                                           | 94 (4)                                                                                                                                                                        |           |           |        |         |         |         |        |                                                                                                                                                                                                                                    |       |            |           |        |         |         |         |        |
| GROUP                                                                                                                                                                                                             | IQ SCORES*                                                                                                                                                                    |           |           |        |         |         |         |        |                                                                                                                                                                                                                                    |       |            |           |        |         |         |         |        |
| treatment                                                                                                                                                                                                         | 98 (5)                                                                                                                                                                        |           |           |        |         |         |         |        |                                                                                                                                                                                                                                    |       |            |           |        |         |         |         |        |
| control                                                                                                                                                                                                           | 106 (7)                                                                                                                                                                       |           |           |        |         |         |         |        |                                                                                                                                                                                                                                    |       |            |           |        |         |         |         |        |
| placebo                                                                                                                                                                                                           | 94 (4)                                                                                                                                                                        |           |           |        |         |         |         |        |                                                                                                                                                                                                                                    |       |            |           |        |         |         |         |        |

# Q2 Are *any* written measures that summarize data variability defined as SEM?

## DEFINITIONS

### Measures that summarize data variability.

These include the standard deviation (SD), the standard error of the mean (SEM), 95% CI, the interquartile or similar range (IQR) and the range.

## SCOPE

Numerical values reported in the main text of the article, tables or figure legends.

## POSSIBLE ANSWERS

### NA

No such measures are reported, or measures are not defined.

### 0 or no

No.

### 1 or yes

Yes.

| 0 (no)                                                                                                                                                                                                           | 1 (yes)                                                                                                                                                                |
|------------------------------------------------------------------------------------------------------------------------------------------------------------------------------------------------------------------|------------------------------------------------------------------------------------------------------------------------------------------------------------------------|
| "Their mean age was 27.3 (4.5)."                                                                                                                                                                                 | "Their mean age was 27.3 (4.5), mean (SEM)."                                                                                                                           |
| "The cats weighed 1.6±0.4 kg (mean ±SD), and the amount of food they ate varied considerably (100 g/day [50-375]; median [range])."                                                                              | "The cats weighed 1.6±0.4 kg (mean ±SEM), and the amount of food they ate varied considerably (100 g/day [50-375]; median [range])."                                   |
| "Their mean age was 32±4. Stimulus intensity was adjusted for each subjects (1.3±0.4mA) before the start of the next trial. [...] The effect of brain stimulation on hot dog cravings is reported as mean ± SD." | "Their mean age was 32±4. Stimulus intensity was adjusted for each subjects (1.3±0.4mA) before the start of the next trial. [...] Results are reported as mean ± SEM." |

# Q3 When null-hypothesis testing is used, are p-values for ***all*** primary analyses, main effects and interactions reported or implied?

## DEFINITIONS

**Main effects and interactions.** Results of ANOVA-type statistical tests.

**Primary analyses.** Statistical tests that are ***not*** post-hoc tests of an ANOVA-type analysis. Examples include t-tests, Chi-square tests, Pearson's product-moment correlations, regression-type analyses. If several t-tests are performed when an ANOVA would be more appropriate, these t-tests will be considered as primary analyses.

**Implied.** For example "There was no main effect of *group*" or "There was no age difference between groups" or "The *group* by *time* interaction was non-significant". Simply stating ANOVA before reporting post-hoc results does **NOT** count.

## SCOPE

Reported or implied p-values may be located in the main text of the paper, tables or figures.

## POSSIBLE ANSWERS

### NA

The paper does not include primary analyses, main effects or interactions.

### 0 or no

The paper includes primary analyses, main effects or interactions, but at least one of these does not have a reported or implied p-value.

### 1 or yes

The paper includes primary analyses, main effects or interactions, and all of these have reported or implied p-values.

# Q3 When null-hypothesis testing is used, are p-values for ***all*** primary analyses, main effects and interactions reported or implied?

0 (no)

“The cells were inhibited by the DOWN-receptor at time-point 2, 3 and 6 (Dunnett post-hoc test,  $p < 0.05$ ).”

“The cells were inhibited by the DOWN-receptor at time-point 2, 3 and 6 (ANOVA, Dunnett post-hoc test,  $p < 0.05$ ).”

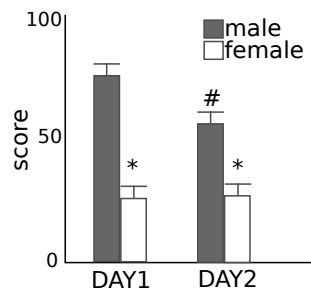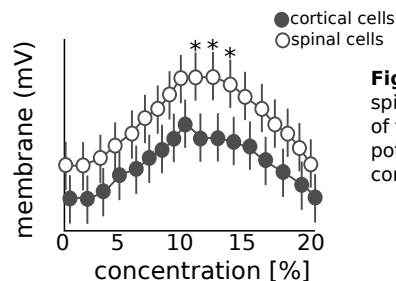

**Figure 3.** Plotted are the results for cortical and spinal cells when exposed to different concentration of factor #452-Zion. As can be seen, the membrane potential of spinal cells was significantly less when the concentration was 11, 12 and 13 % (\*  $p < 0.05$ ).

1 (yes)

“The DOWN-receptor had a **significant** impact on cell excitability, causing significant inhibited at time-points 2, 3 and 6 (Dunnett post-hoc test,  $p < 0.05$ ).” (**implied**)

“The DOWN-receptor had a significant impact on cell excitability ( **$F(42,2)=22.4$ ,  $p=0.012$** ), causing significant inhibited at time-points 2, 3 and 6 (Dunnett post-hoc test,  $p < 0.05$ ).” (**reported**)

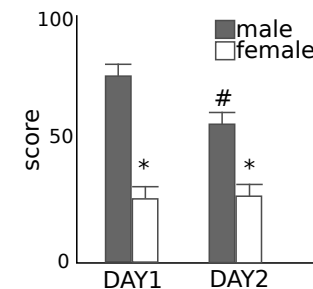

main effect of gender:  $F_{(66,1)} = 42.5$ ,  $p < 0.001$   
main effect of day:  $F_{(2,1)} = 24.8$ ,  $p = 0.024$   
gender by day interaction:  $F_{(30,4)} = 19.0$ ,  $p = 0.016$

\* Different from male on same day,  $p < 0.01$   
# Male different between days,  $p < 0.05$

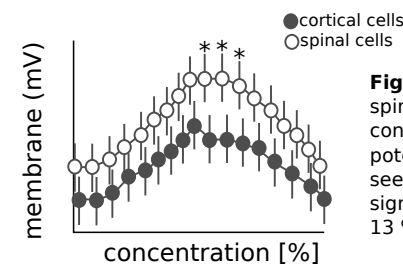

**Figure 3.** Plotted are the results for cortical and spinal cells showing the significant effect of different concentration of factor #452-Zion on membrane potential excitability ( $F_{(128,21)}=54.2$ ,  $p=0.003$ ). As can be seen, the membrane potential of spinal cells was significantly less when the concentration was 11, 12 and 13 % (Bonferonni post-hoc \*  $p < 0.05$ ).

# Q4 When null-hypothesis testing is used, are reported or implied p-values exact for ***all*** primary analyses, main effects and interactions?

## DEFINITIONS

**Main effects and interactions.** Results of ANOVA-type statistical tests.

**Primary analyses.** Statistical tests that are ***not*** post-hoc tests of an ANOVA-type analysis. Examples include t-tests, Chi-square tests, Pearson's product-moment correlations, regression-type analyses. If several t-tests are performed when an ANOVA would be more appropriate, these t-tests will be considered as primary analyses.

**Implied.** For example "There was no main effect of *group*" or "There was no age difference between groups" or "The *group* by *time* interaction was non-significant".

**exact.** Refers to  $p = 0.xxx$  (e.g.,  $p=0.012$ ,  $p=0.564$ ,  $p=0.002$ ) and  $p<0.001$ .

## SCOPE

Reported or implied p-values may be located in the main text of the paper, tables or figures.

## POSSIBLE ANSWERS

### NA

The paper does not report primary analyses, main effects or interactions.

### 0 or no

No.

### 1 or yes

Yes.

# Q4 When null-hypothesis testing is used, are reported or implied p-values exact for **all** primary analyses, main effects and interactions?

0 (no)

"The DOWN-receptor had a significant impact on cell excitability, causing significant inhibition at time-points 2, 3 and 6 (Dunnett post-hoc test,  $p < 0.05$ )."

"The DOWN-receptor had a significant impact on cell excitability ( $p < 0.05$ ), causing significant inhibited at time-points 2, 3 and 6 (Dunnett post-hoc test,  $p < 0.05$ )."

"The ANOVA revealed a main effect of time ( $P < 0.05$ ) and a main effect of group ( $p < 0.01$ ), but no time by group interaction ( $p > 0.05$ )."

"The ANOVA revealed a main effect of time ( $P = 0.012$ ), but there was no main effect of group or time by group interaction."

"The subjects weight was significantly correlated with age ( $r = 0.12$ ), income ( $r = 0.09$ ) and foot length ( $r = 0.56$ ). The other correlation were not significant."

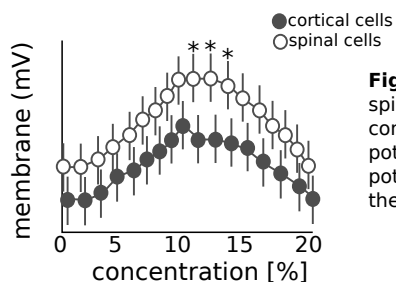

1 (yes)

"The DOWN-receptor had a significant impact on cell excitability ( $F(42,2) = 22.4$ ,  $p = 0.012$ ), causing significant inhibition at time-points 2, 3 and 6 (Dunnett post-hoc test,  $p < 0.05$ )."

"The DOWN-receptor had a significant impact on cell excitability ( $F(42,2) = 22.4$ ,  $p = 0.012$ ), causing significant inhibited at time-points 2, 3 and 6 (Dunnett post-hoc test,  $p < 0.05$ )."

"The ANOVA revealed a main effect of time ( $P = 0.012$ ) and a main effect of group ( $p < 0.001$ ), but no time by group interaction ( $p = 0.545$ )."

"The ANOVA revealed a main effect of time ( $P = 0.012$ ) and a main effect of group ( $p < 0.001$ ), but no time by group interaction ( $p = 0.545$ )."

"The subjects weight was significantly correlated with age ( $r = 0.12$ ,  $p = 0.012$ ), income ( $r = 0.09$ ,  $p = 0.0258$ ) and foot length ( $r = 0.56$ ,  $p < 0.001$ ). However, weight was not correlated with IQ ( $r = 0.16$ ,  $p = 0.556$ ) or perceived index finger length ( $r = 0.01$ ,  $p = 0.06$ )"

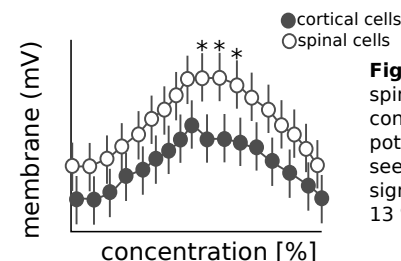

# Q5 If ANOVA-type analyses are used, are *all* reported or implied post-hoc p-values exact?

## DEFINITIONS

**Implied.** For example "Values at 10 and 15 min were significantly different from baseline".

**exact.** Refers to  $p = 0.xxx$  (e.g.,  $p=0.012$ ,  $p=0.564$ ,  $p=0.002$ ) and  $p<0.001$ .

## SCOPE

Reported or implied post-hoc p-values may be located in the main text of the paper, tables or figures.

## POSSIBLE ANSWERS

### NA

The paper does not report or imply any post-hoc comparisons.

### 0 or no

No.

### 1 or yes

Yes.

### 0 (no)

"The DOWN-receptor caused a significant inhibition at time-points 2, 3 and 6 ( $p<0.05$ )."

"Post-hoc comparison revealed a significant reduction in membrane potential at the two highest stimulus intensities."

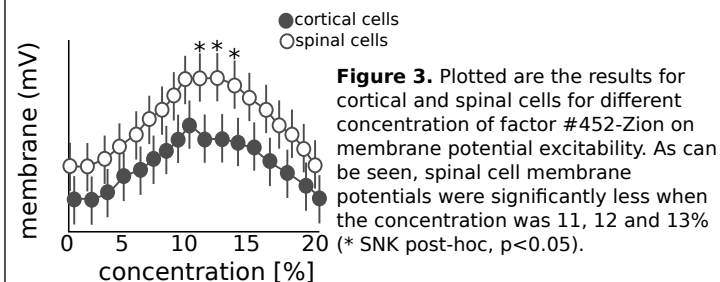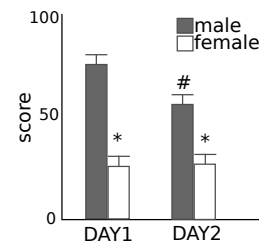

\* Different from males on same day,  $p<0.01$   
# Male different between days,  $p<0.05$

### 1 (yes)

"The DOWN-receptor caused a significant inhibition at time-points 2, 3 and 6 ( $p<0.001$ )."

"The DOWN-receptor caused a significant inhibition at time-points 2 ( $p=0.021$ ), 3 ( $p=0.004$ ) and 6 ( $p=0.019$ )."

"Post-hoc comparison revealed a significant reduction in membrane potential at 2mA ( $p=0.038$ ) and 5mA ( $p<0.001$ )."

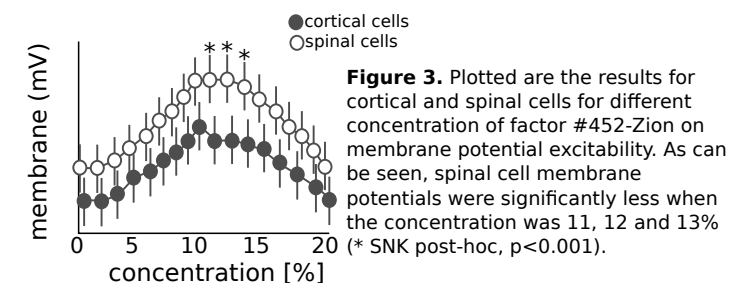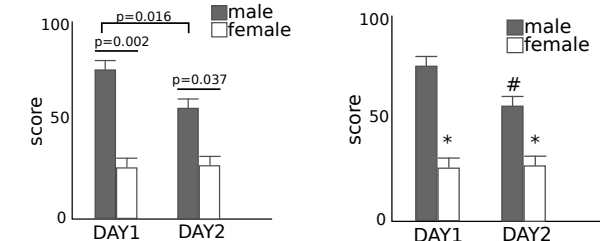

\* Different from males on same day,  $p<0.001$   
# Male different between days,  $p=0.042$

# Q6 Are *all* plotted measures that summarize variability defined?

## DEFINITIONS

**Measures that summarize data variability.** These include the standard deviation (SD), the standard error of the mean (SEM), 95% CI, the interquartile or similar range (IQR) and the range.

## SCOPE

Figures that are included are those that visually summarize data variability, whether it be for multiple samples from a single subject, or data from multiple subjects.

## POSSIBLE ANSWERS

### NA

The paper does not contain such figures.

### 0 or no

No.

### 1 or yes

Yes.

## 0 (no)

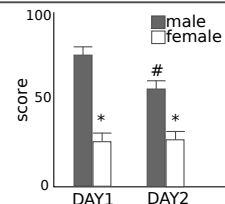

**Figure 1.** Effect of factor Z23#15 on scores of male and female subjects. \* Different from males on same day,  $p < 0.01$ . # Male different between days,  $p < 0.05$ .

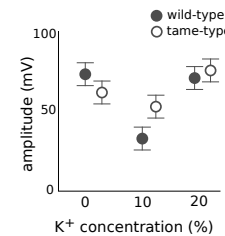

**Figure 1.** Effect of K<sup>+</sup> concentration on retinal reflex amplitude for wild- and tame-type mice.

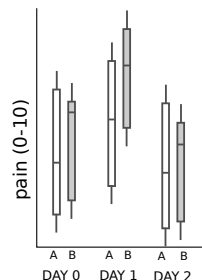

**Figure 1.** Change in pain scores across days for people who had to only use words starting with 'A' or 'B'.

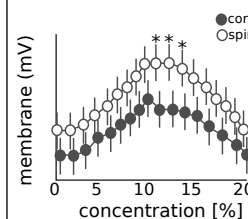

**Figure 3.** Plotted are the results for cortical and spinal cells showing the significant effect of different concentration of factor #452-Zion on membrane potential excitability. (\*  $p < 0.05$ ).

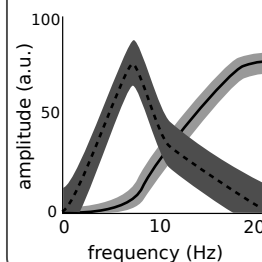

**Figure 2.** Individual subject data showing the frequency response of the toe (dashed line) and hip joint (solid line).

## 1 (yes)

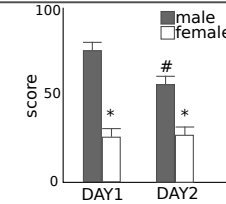

**Statistical analysis**  
Blah Blah [...]. Results are reported as mean $\pm$ SD.

OR

**Figure 1.** Effect of factor Z23#15 on scores of male and female subjects. \* Different from males on same day,  $p < 0.01$ . # Male different between days,  $p < 0.05$ . Values are mean $\pm$ SD.

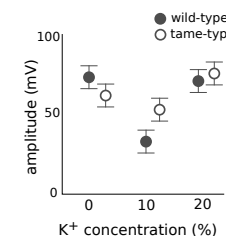

**Statistical analysis**  
Blah Blah [...]. All values are reported as mean $\pm$ SEM.

OR

**Figure 1.** Effect of K<sup>+</sup> concentration on retinal reflex amplitude for wild- and tame-type mice. Values are mean $\pm$ SEM.

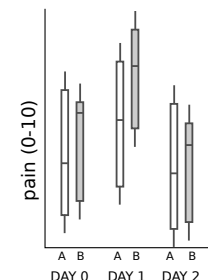

**Statistical analysis**  
Blah Blah [...]. All values are reported as median and interquartile range. In figures, vertical lines depict range.

OR

**Figure 1.** Change in pain scores across days for people who had to only use words starting with 'A' or 'B'. Boxplots represent median and interquartile range; vertical lines depict range.

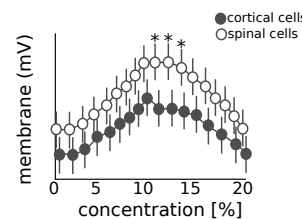

**Statistical analysis**  
Blah Blah [...]. All values are reported as mean $\pm$ SD.  
OR

**Figure 3.** Plotted are the results for cortical and spinal cells showing the significant effect of different concentration of factor #452-Zion on membrane potential excitability. (\*  $p < 0.05$ ). Values are mean $\pm$ SD.

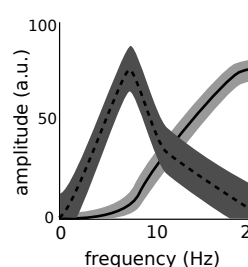

**Figure 2.** Individual subject data showing the frequency response of the toe (dashed line) and hip joint (solid line). Shaded area represent 95% confidence interval.

# Q7 Are *any* plotted measures that summarize variability defined as SEM?

## DEFINITIONS

**Measures that summarize data variability.** These include the standard deviation (SD), the standard error of the mean (SEM), 95% CI, the interquartile or similar range (IQR) and the range.

## SCOPE

Figures that are included are those that visually summarize **data variability**, whether it be for multiple samples from a single subject, or data from multiple subjects. **Do not** consider figures without measures that summarize variability.

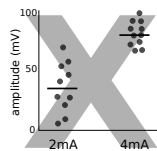

## POSSIBLE ANSWERS

**NA**

The paper does not contain such figures.

**0 or no**

No.

**1 or yes**

**0 (no)**



**Figure 1.** Effect of factor Z23#15 on scores of male and female subjects. \* Different from males on same day,  $p < 0.01$ . # Male different between days,  $p < 0.05$ . Error bars represent 95% CI.



**Figure 1.** Effect of K<sup>+</sup> concentration on retinal reflex amplitude for wild- and tame-type mice. Values represent mean ± SD.

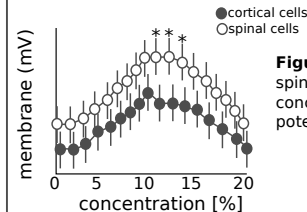

**Figure 3.** Plotted are the results for cortical and spinal cells showing the significant effect of different concentration of factor #452-Zion on membrane potential excitability. (\*  $p < 0.05$ ).

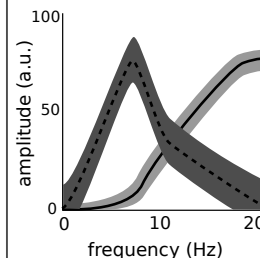

**Figure 2.** Individual subject data showing the frequency response of the toe (dashed line) and hip joint (solid line). Shaded area represents 95% CI.

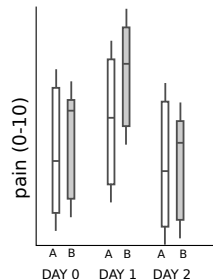

**Figure 1.** Change in pain scores across days for people who had to only use words starting with 'A' or 'B'. Boxplots represent median and interquartile range; vertical lines depict range.

**1 (yes)**



### Statistical analysis

Results are reported as mean ± SEM.

OR

**Figure 1.** Effect of factor Z23#15 on scores of male and female subjects. \* Different from males on same day,  $p < 0.01$ . # Male different between days,  $p < 0.05$ . Values are mean ± SEM.



### Statistical analysis

All values are reported as mean ± SEM.

OR

**Figure 1.** Effect of K<sup>+</sup> concentration on retinal reflex amplitude for wild- and tame-type mice. Values are mean ± SEM.

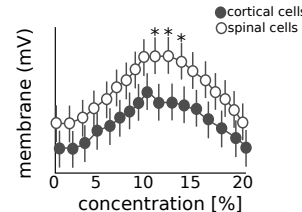

### Statistical analysis

All values are reported as mean ± SD.

OR

**Figure 3.** Plotted are the results for cortical and spinal cells showing the significant effect of different concentration of factor #452-Zion on membrane potential excitability. (\*  $p < 0.05$ ). Values are mean ± SEM.

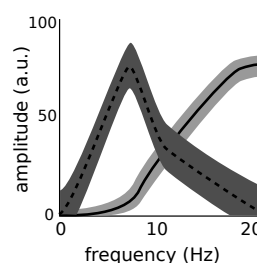

**Figure 2.** Individual subject data showing the frequency response of the toe (dashed line) and hip joint (solid line). Shaded area represent SEM.

# Q8 For *all* figures that plot measures that summarize data/variability, are the raw data used to calculate the variability plotted?

## DEFINITIONS

**Measures that summarize data variability.** These include the standard deviation (SD), the standard error of the mean (SEM), 95% CI, the interquartile or similar range (IQR) and the range.

## SCOPE

Figures that are included are those that visually summarize data variability, whether it be for multiple samples from a single subject, or data from multiple subjects.

Figures that connect sequential values with a line **are not** to be considered.

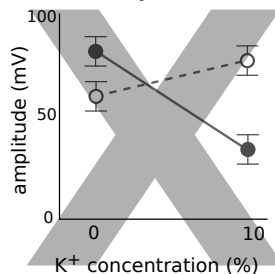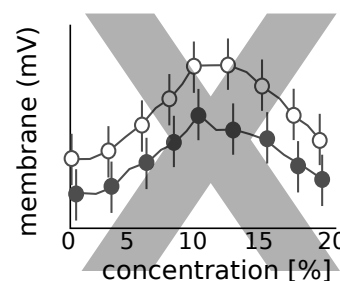

## POSSIBLE ANSWERS

**NA**

The paper does contain such figures.

**0 or no**

No.

**1 or yes**

Yes.

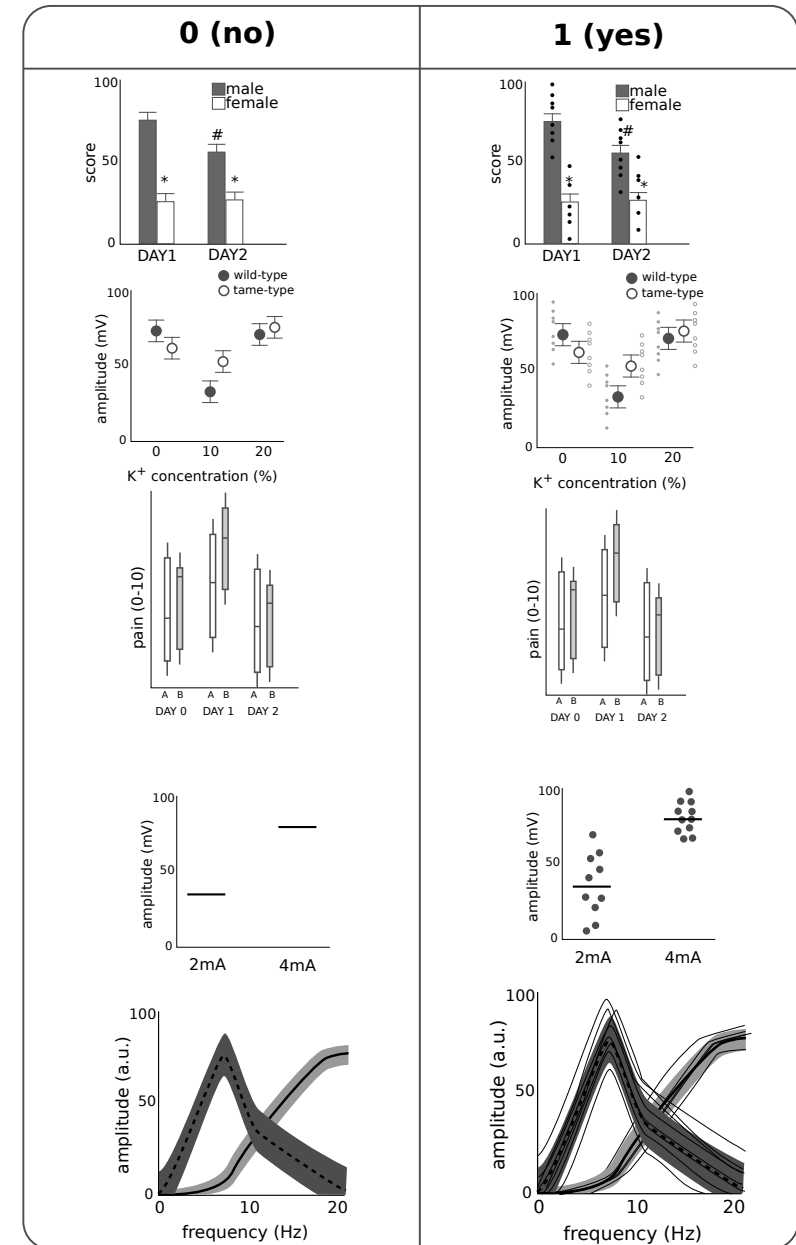

**Q9** Does the paper report ***any*** exact p-values that are between 0.05-0.1 ?

**SCOPE**

This relates to exact p-values ( $p=0.1$ ;  $p=0.0742$ ) reported in the main text of the article, tables and figures.

**POSSIBLE ANSWERS**

**NA**

The paper does not report p-values.

**0 or no**

No.

**1 or yes**

Yes.

**Q10** Are ***any*** of the exact p-values that are between 0.05-0.1 interpreted as trends or statistically significant?

**SCOPE**

This relates to exact p-values ( $p=0.0742$ ) reported in the main text of the article, tables and figures. **!!** If there is spin, consider copying the relevant text in the Comment section.

**POSSIBLE ANSWERS**

**NA**

The paper does not report exact p-values between 0.05-0.1.

**0 or no**

No.

**1 or yes**

Yes.

| 0 (no)                                                  | 1 (yes)                                                                                                                      |
|---------------------------------------------------------|------------------------------------------------------------------------------------------------------------------------------|
| "The effect of heat was not significant ( $p=0.062$ )." | "There was a trend for heat to effect the outcome ( $p=0.062$ )."<br><br>"The effect of heat was significant ( $p=0.062$ )." |
